1 **Sequential regulation of maternal mRNAs through a conserved cis-acting element**  
2 **in their 3'UTRs**

3  
4 Pooja Flora<sup>1</sup>, Siu Wah Wong-Deyrup<sup>1</sup>, Elliot Todd Martin<sup>1</sup>, Ryan J Palumbo<sup>1,#a</sup>,  
5 Mohamad Nasrallah<sup>1,#b</sup>, Andrew Oligney<sup>1,#c</sup>, Patrick Blatt<sup>1</sup>, Dhruv Patel<sup>1,#d</sup>, Gabriele  
6 Fuchs<sup>1</sup> and Prashanth Rangan<sup>1,5</sup>

7  
8  
9 <sup>1</sup>Department of Biological Sciences/RNA Institute, University at Albany SUNY, Albany,  
10 NY 12222, USA

11 <sup>#a</sup>Current address: Department of Biochemistry and Molecular Biology, Upstate Medical  
12 University, SUNY, Syracuse, NY 13210, USA

13 <sup>#b</sup>Current address: University of Massachusetts Medical School, Worcester, MA 01605,  
14 USA

15 <sup>#c</sup>Current address: Touro College of Osteopathic Medicine (TouroCOM), Middletown,  
16 NY 10940

17 <sup>#d</sup>Current address: Albany Medical College, Albany, NY 12208

18 <sup>5</sup>Author of correspondence

19  
20  
21  
22  
23  
24  
25  
26 Prashanth Rangan

27 Department of Biological Sciences/RNA Institute

28 University at Albany SUNY

29 1400 Washington Avenue

30 Albany, NY 12222

31 Tel 518 442 3485, Fax 518 442 4354, Email: prangan@albany.edu

32 **Abstract**

33 Maternal mRNAs are synthesized during oogenesis to initiate the development of future  
34 generations. Some maternal mRNAs are determinants of somatic or germline fate and  
35 must be translationally repressed until embryogenesis. However, the translational  
36 repressors themselves are also temporally regulated. We use *polar granule component*  
37 (*pgc*), a *Drosophila* maternal mRNA, as a model system to ask how maternal mRNAs  
38 are repressed while the regulatory landscape is continually shifting. *pgc*, a potent  
39 transcriptional silencer and germline determinant, is translationally regulated throughout  
40 oogenesis. We find that the 3'UTR of *pgc* mRNA contains a conserved ten-nucleotide  
41 sequence that is bound by different conserved RNA binding proteins (RBPs) at different  
42 stages of oogenesis to continuously repress translation except for a brief expression in  
43 the stem cell daughter. Pumilio (Pum) binds to this sequence in undifferentiated and  
44 early differentiating oocytes and recruits other temporally restricted translational  
45 regulators to block *pgc* translation. After differentiation, Pum levels diminish and Bruno  
46 (Bru) levels increase, allowing Bru to bind the same 3'UTR sequence and take over  
47 translational repression of *pgc* mRNA. We have identified a class of maternal mRNAs  
48 regulated during oogenesis by both Pum and Bru, including *Zelda*, activator of the  
49 zygotic genome, which contain this core 10-nt regulatory sequence. Our data suggests  
50 that this hand off mechanism is more generally utilized to inhibit translation of maternal  
51 mRNAs during oogenesis.

52

53

54

55

56

57

58

59

60

61

62

## 63 **Introduction**

64 The germ line gives rise to the eggs and sperm that launch the next generation. Upon  
65 fertilization, the egg differentiates into every cell lineage present in the adult organism,  
66 including a new germ line and is therefore totipotent (Seydoux and Braun 2006; Cinalli  
67 et al. 2008). Pivotal to the egg's task of kick-starting the next generation is a maternally  
68 synthesized trust fund of mRNAs that are deposited into the egg during oogenesis  
69 (Lasko 2012). Post fertilization, and prior to zygotic genome activation, translation of  
70 these maternally supplied mRNAs help power early development (Evans 2005; Zhang  
71 and Smith 2015; Tadros and Lipshitz 2009; Becalska and Gavis 2009; Lee et al. 2014).  
72 Some of the maternally supplied mRNAs code for key determinants of both somatic and  
73 germ cell fate, and thus need to be exquisitely regulated both during oogenesis and  
74 early embryogenesis.

75

76 RNA binding proteins (RBPs) regulate the maternal pool of mRNA through interactions  
77 with specific sequences within the 3' untranslated regions (UTRs) of their target mRNAs  
78 (Kuersten and Goodwin 2003; Rosario et al. 2017; Moor et al. 2005; Slaidina and  
79 Lehmann 2014; Johnstone and Lasko 2001; Evans 2005). Loss of RBPs during  
80 oogenesis results in death, sterility or germ line to soma trans-differentiation (Ciosk  
81 2006; Forbes and Lehmann 1998; Mak et al. 2016; Tsuda 2003). This suggests that  
82 RBPs are critical for silencing key somatic and germ line determinants during  
83 oogenesis. Consistent with this observation, it has been shown that gene regulation  
84 during oogenesis and early embryogenesis relies primarily on the 3'UTRs of mRNAs  
85 rather than on their (Merritt et al. 2008; Rangan et al. 2009a). Additionally, loss of  
86 specific sequences in the 3'UTR of maternal mRNAs results in their dysregulation (Kim-  
87 Ha et al. 1995; Wharton and Struhl 1991). However, several RBPs that are regulators of  
88 translation also fluctuate in levels, with these fluctuations promoting critical  
89 developmental transitions. For example, during *C. elegans* oogenesis two RBPs, GLD-1  
90 and MEX-3, whose loss results in germ line to soma trans-differentiation, have a  
91 reciprocal expression pattern (Jones et al. 1996; Draper et al. 1996; Mootz et al. 2004;  
92 Ciosk 2006). In human fetal ovary, RBPs such as Deleted in Azoospermia-like (DAZL)  
93 play an important role in regulating RNA targets, such as *TEX11*, a gene required for

94 recombination and DNA repair, via its 3'UTR (Rosario et al. 2017). However, DAZL itself  
95 has a dynamic expression pattern during human oogenesis in which it is robustly  
96 expressed in the pre-meiotic and post-meiotic germ cells but absent during meiotic  
97 stages (Anderson et al. 2007; He et al. 2013). The conundrum remains as to how  
98 mRNAs can be continually silenced during oogenesis when the RBPs that regulate  
99 them fluctuate.

100

101 *Drosophila* oogenesis is an excellent model to investigate how maternal mRNAs are  
102 continuously regulated. Oogenesis in *Drosophila* begins when germline stem cells  
103 (GSCs) divide to both self-renew and give rise to a stem cell daughter called a  
104 cystoblast (CB) (Fig. 1A-B) (Chen and McKearin 2003). The CB differentiates by  
105 undergoing four incomplete mitotic divisions to give rise to a 2-, 4-, 8-, and 16-cell cyst  
106 (Fig. 1B) (Koch et al. 1967; McKearin and Ohlstein 1995; McKearin and Spradling  
107 1990). Of these sixteen cells, one is designated as the oocyte and the other fifteen  
108 cells become nurse cells (Fig. 1A) (Spradling et al. 1997); the maternal mRNAs and  
109 proteins synthesized by the nurse cells are deposited into the oocyte (Zalokar 1960).  
110 The oocyte and surrounding nurse cells are encapsulated by somatic cells to form an  
111 egg chamber, which progresses through successive developmental stages (Margolis  
112 and Spradling 1995; Gilboa and Lehmann 2004a). These maternal mRNAs which are  
113 deposited into the oocyte need to be post-transcriptionally regulated to promote proper  
114 oogenesis and embryogenesis (Evans 2005; Richter and Lasko 2011; Lasko 2012;  
115 Laver et al. 2015).

116

117 *Polar granule component (pgc)* is a superb candidate to address how such maternal  
118 mRNAs are regulated during the developmental transitions of oogenesis. *pgc* is  
119 synthesized during oogenesis and provided to the oocyte, where it localizes to the germ  
120 plasm (Nakamura et al. 1996). While *pgc* mRNA is continuously present, Pgc is only  
121 translated in two short pulses; once in the CB during oogenesis and once in the germ  
122 cells during embryogenesis (Flora et al. 2018; Hanyu-Nakamura et al. 2008). Pgc  
123 expression in the CB is required to promote the cell's timely differentiation (Flora et al.  
124 2018). Pgc expression in the germ cells is required to repress the expression of somatic

125 genes which could interfere with germ line specification (Hanyu-Nakamura et al. 2008).  
126 Pgc performs these tasks by causing global transcriptional silencing through targeting  
127 the basal transcriptional elongation machinery of RNA polymerase II (Hanyu-Nakamura  
128 et al. 2008; Flora et al. 2018; Martinho et al. 2004). *pgc* can even suppress transcription  
129 in other cell types upon ectopic expression (Timinszky et al. 2008). The strong effects of  
130 Pgc on transcription lead to a requirement for strict regulation of *pgc* translation in the  
131 cells in which it is normally found. It is known that the 3'UTR of *pgc* mRNA is sufficient  
132 to mediate such translational control after differentiation (Rangan et al. 2009b); however  
133 it is currently not known if *pgc* is regulated transcriptionally or translationally prior to  
134 differentiation as well as what trans-acting factors bind to its 3'UTR after differentiation.

135  
136 Temporally restricted RBPs that bind to 3'UTRs regulate critical developmental  
137 transitions during *Drosophila* oogenesis by controlling translation of their targets.  
138 Pumilio (Pum), an RBP that belongs to the conserved Pum and Eem-3 binding factor  
139 (PUF) domain family of proteins, is present at high levels in the undifferentiated cells in  
140 the ovary including GSCs, CBs and early differentiating cysts (Zhang et al. 1997;  
141 Carreira-Rosario et al. 2016; Lin and Spradling 1997; Forbes and Lehmann 1998;  
142 Wickens et al. 2002). Pum represses translation of differentiation-promoting mRNAs in  
143 the GSCs thereby preventing stem cell loss (Forbes and Lehmann 1998; Joly et al.  
144 2013). Pum expression is attenuated in the differentiated stages allowing for the  
145 expression of the differentiation promoting mRNAs (Forbes and Lehmann 1998;  
146 Carreira-Rosario et al. 2016). *Drosophila* Bruno 1 (Bru), a CUGBP and ETR-3 Like  
147 Factor (CELF) superfamily protein, is expressed at increasing levels during  
148 differentiation and is then maintained for the rest of oogenesis (Xin et al. 2013;  
149 Sugimura and Lilly 2006; Webster et al. 1997). Bru regulates several maternal mRNAs  
150 post-differentiation during oogenesis (Good et al. 2000; Moraes et al. 2006; Schüpbach  
151 and Wieschaus 1991; Webster et al. 1997; Snee et al. 2014; Filardo and Ephrussi 2003;  
152 Moore et al. 2009; Castagnetti et al. 2000). Thus, Pum and Bru have reciprocal  
153 temporal regimes and thus could act jointly to repress targets throughout oogenesis.  
154 However, it is not known whether further repression is required of Pum targets after  
155 differentiation, or Bru targets prior to differentiation.

156

157 Pum and Bru during their regimes can use various cofactors to mediate translational  
158 repression using distinct mechanisms. Pum partners with Nanos (Nos) in the GSCs to  
159 recruit translation modulators such as Twin, a deadenylase causing a shortening of the  
160 poly(A)-tail (Joly et al. 2013). Pum can also recruit Brain Tumor (Brat) which is known to  
161 modulate translation by interacting with *Drosophila* Eukaryotic translation initiation factor  
162 4E Homologous Protein (d4EHP), a cap binding protein (Cho et al. 2006; Harris et al.  
163 2011). Bru can form oligomers to form silencing particles or can partner with Cup, which  
164 associates with the 5'-cap binding initiation factor eIF4E, to regulate mRNAs (Nakamura  
165 et al. 2004; Kim-Ha et al. 1995; Chekulaeva et al. 2006; Filardo and Ephrussi 2003; Kim  
166 et al. 2015b). Why certain mechanisms are preferred over others at a particular  
167 temporal regime is not known.

168

169 Here, we elucidate an intricate and elegant control mechanism ensuring handoff of  
170 translational repression of a germ line determinant, *pgc*, from one set of regulators to  
171 another, with the exception of a single gap in the CB. This governs the critical temporal  
172 control of *pgc* production just in CBs, ensuring proper maintenance of GSCs and their  
173 conversion into differentiated progeny. We demonstrate that this control depends on a  
174 10-nucleotide (nt) sequence in the 3'UTR of *pgc* mRNA. In the undifferentiated stages,  
175 we find that Pum binds the 10-nt sequence and partners with Nos and the CCR4-Not  
176 complex to regulate *pgc* mRNA in a poly(A) dependent manner. When Nos levels drop  
177 in CBs, *pgc* is expressed. After CB differentiation, Pum switches partners to use Brat to  
178 suppress *pgc* in the early differentiating cysts in a cap dependent manner. However,  
179 when Pum levels diminish, *pgc* mRNA is bound by Bru via the same 10-nt sequence to  
180 translationally regulate it. Bru recruits Cup to silence *pgc* translation also in a cap  
181 dependent manner. We find that a class of maternal mRNAs, including *zelda*, which  
182 play pivotal roles during development, are also regulated by both Pum and Bru and  
183 contain this 10-nucleotide sequence. This suggests that the sequential hand off of  
184 mRNAs between Pum and Bru is broadly utilized to control fine-scale translation of  
185 maternal RNAs. We propose that this handoff mechanism from one set of trans-acting  
186 factors that utilizes a poly(A) shortening to another set of trans-acting factors that

187 utilizes cap dependent mechanism is required to protect mRNAs post-differentiation and  
188 prime them for translation during embryogenesis.

189

## 190 **Results**

### 191 **Pgc is translationally regulated via its UTRs**

192 During oogenesis, Pgc protein is expressed only in the CBs, where it promotes timely  
193 differentiation (Fig. 1C) (Flora et al. 2018). To assess if this temporal specificity of Pgc  
194 protein production is due to transcriptional or translational regulation, we first carried out  
195 fluorescent *in situ* hybridization (FISH) in both wild-type and *pgcGFP* reporter ovaries.  
196 *pgc* transcription in the GSCs was difficult to discern because of the low resolution of  
197 FISH in the germarium, however we did detect *pgc* mRNA in all later differentiated  
198 stages (Fig. 2D, Supplemental Fig. S1A-C). To assess *pgc* mRNA expression in the  
199 GSCs through an alternate method, we over-expressed the self-renewal signaling  
200 receptor, Thick Veins Receptor (TKV), to enrich for GSCs and then sequenced their  
201 transcriptome (Xie and Spradling 1998). We detected 88 transcripts per million (TPM) of  
202 *pgc* transcript indicating that the mRNA is transcribed in the GSCs (Fig. 1E,  
203 Supplemental Fig. S1D). To further substantiate that the *pgc* promoter is active in the  
204 GSCs, we created a reporter construct in which the *pgc* promoter drives the expression  
205 of GFP flanked by the *nos* 5'UTR and *K10* 3'UTR, which are not translationally silenced  
206 during oogenesis (Fig. 1F) (Serano et al. 1994; Gavis and Lehmann 1994; 1992). We  
207 observed GFP expression throughout oogenesis, including in the GSCs. This suggests  
208 that the maternal *pgc* mRNA is transcribed from the GSCs onward throughout  
209 oogenesis and is under strict translational regulation pre- and post-differentiation  
210 (Rangan et al. 2009b).

211

212 Given that 5'UTR and 3'UTR of an mRNA are commonly recognized by sequence-  
213 specific RBPs that regulate translation (Wilkie et al. 2003), we wanted to test the  
214 potential role of both the 5' and 3'UTR of *pgc* in repressing translation in the GSCs. *pgc*  
215 mRNA has two annotated 5'UTRs; to determine which one was specifically expressed  
216 in the GSCs, we designed primers that distinguish these two forms. We carried out PCR  
217 on RNA enriched from GSCs by over-expressing the self-renewal signaling receptor,



218 TKV, and for CBs, by using a mutation for differentiation factor, *bam* (Xie and Spradling  
219 1998; McKearin and Ohlstein 1995). We found that only the short form was expressed  
220 in the GSCs and CBs (Supplemental Fig. S1E). To determine if this short *pgc* 5'UTR is  
221 required for translational regulation of *pgc*, we swapped it with the *nos* 5'UTR in a GFP  
222 reporter construct that still retained the *pgc* 3'UTR and the *pgc* promoter. We found that  
223 the absence of the *pgc* 5'UTR results in an upregulation of GFP protein expression in  
224 the GSCs but not in later stages (Fig. 1G). Our results indicate that in GSCs, the *pgc*  
225 5'UTR is required for translational regulation, while the 3'UTR is not sufficient (Fig.1G).  
226 In differentiated stages, the 3'UTR alone is sufficient to mediate translational regulation  
227 (Fig.1G). To test if the 5'UTR is sufficient for translational regulation in GSCs, we  
228 created a construct with the *pgc* 5'UTR and non-repressed *tubulin* (*tub*) 3'UTR flanking  
229 GFP under the control of the *pgc* promoter (Fig. 1H). GFP was still expressed in the  
230 GSCs as well as in later differentiating stages and egg chambers demonstrating that the  
231 5'UTR alone is not sufficient for translational regulation (Fig. 1H). Taken together, we  
232 conclude that both the *pgc* 5' and 3'UTR are required for translational control pre-  
233 differentiation in the GSCs, and that the 3'UTR alone is sufficient post-differentiation in  
234 the cysts and egg chambers.

235

### 236 **A cis-element in the *pgc* 3'UTR that binds both Pum and Bru is required for** 237 **translational control throughout oogenesis**

238 We predicted that cis-acting sequences in either the 5' or 3' UTRs of *pgc* could regulate  
239 translation during oogenesis by recruiting trans-acting factors such as RBPs. To identify  
240 these sequences, we carried out a phylogenetic analysis of the *pgc* 5' and 3'UTR in  
241 Drosophilids that were separated by 40 million years of evolution and discovered  
242 several regions of conservation in the 3'UTR (Supplemental Fig. S2A). We could not  
243 identify unique conserved regions in the *pgc* 5'UTR as the sequence overlaps with the  
244 coding region of *Type III alcohol dehydrogenase* (*T3dh*) on the opposite chromosomal  
245 arm. We also used algorithms that search for RBP binding sequences, and did not find  
246 any in the short form 5'UTR of *pgc* (Bailey et al. 2009). In the 3'UTR, a conserved 10-nt  
247 sequence, UUUGUAAUU, stood out (Fig. 2A, Supplemental Fig. S2A). This sequence  
248 closely matches the sequences AUUGUACAUA and UUUGUAAUUU, which have been



249 previously described as a the Pumilio Response Element (PRE), which is part of the  
250 Nanos Response Element (NRE) in *hunchback* (*hb*) and *Cyclin B* (*CycB*), respectively  
251 (Wharton and Struhl 1991; Weidmann et al. 2016; Murata and Wharton 1995; Kadyrova  
252 et al. 2007). PREs are known to bind Pum, which then recruits Nos, to the bind to the  
253 Nanos Binding Sequences (NBS) resulting in translational regulation of RNAs (Fig. 2A)  
254 (Asaoka-Taguchi et al. 1999; Kadyrova et al. 2007; Muraro et al. 2008; Sonoda and  
255 Wharton 1999; Murata and Wharton 1995). This sequence in the *pgc* 3'UTR can also  
256 bind another conserved RBP, Bru. Pum binds to the UGUA motif while Bru binds to a  
257 uU<sup>G/A</sup>U<sup>G/A</sup>U<sup>G/A</sup>Uu motif which is described as the Bruno Response Element (BRE) (Kim-  
258 Ha et al. 1995; Wharton and Struhl 1991).

259  
260 We asked if this conserved 10-nt sequence that is predicted to bind two RBPs can  
261 regulate *pgc* translation. To test this, we generated a reporter construct that deleted 8-nt  
262 of the conserved sequence including the UGUA motif that is known to bind Pum and the  
263 uU<sup>G/A</sup>U<sup>G/A</sup> motif that binds Bru. This resulted in an upregulation of translation throughout  
264 oogenesis (Fig. 2B-C, E Supplemental Fig. S2D). We also generated three other  
265 transgenes in which we mutated the core UGUA motif to UUUU and UCUC and also  
266 deleted the core UGUA motif respectively. We found that all three of these changes  
267 resulted in ectopic GFP expression throughout oogenesis (Fig. 2D-E, Supplemental Fig.  
268 S2B-D). Thus, we conclude that the conserved 10-nt sequence in the *pgc* 3'UTR that is  
269 predicted to bind Pum and Bru controls translation of *pgc* throughout oogenesis.

270  
271 To determine if the conserved sequence actually binds Pum and Bru as predicted, we  
272 purified the recombinant RNA binding domain of Pum (residues 1091-1426) and full  
273 length Bru and carried out Electrophoresis Mobility Shift Assay (EMSA) experiments  
274 (Supplemental Fig. S2E) (Chekulaeva et al. 2006; Weidmann et al. 2016). As positive  
275 controls, we utilized the NRE in *CycB* and the BRE in *Oskar's* (*osk*) 3'UTR and first  
276 demonstrated that our recombinant Pum and Bru bound the NRE and BRE, respectively  
277 (Fig. 2F) (Kadyrova et al. 2007; Kim-Ha et al. 1995). Both Pum and Bru also bound the  
278 PRE in the 3'UTR of *pgc*, but only in the presence of the conserved 10-nt sequence  
279 (Fig. 2F). To test, if Pum and Bru also bind to *pgc* mRNA *in vivo*, we performed an

280 immuno-precipitation (IP) experiment with anti-Pum antibody and with anti-Bru antibody  
281 in wild-type ovary lysates. We observed that *pgc* mRNA associated with both Pum and  
282 Bru upon their respective pull down (Fig. 2G, Supplemental Fig. S2F). Thus, we  
283 conclude that Pum and Bru bind to the 10-nt PRE of *pgc* 3'UTR *in vitro* and to *pgc*  
284 mRNA *in vivo*.

285

### 286 **Pum and its co-factor Nos regulate Pgc translation in the GSCs and early** 287 **differentiating cysts**

288 We asked if *pgc* was translationally regulated by Pum and Bru during oogenesis, and in  
289 particular, given their inverse expression patterns, if they might each govern distinct  
290 phases. Pum is expressed from the GSCs to the 8-cell cysts and is attenuated from the  
291 16-cell cyst onwards (Supplemental Fig. S2G-G2') (Forbes and Lehmann 1998;  
292 Carreira-Rosario et al. 2016). Bru levels are low from GCSs to the 8-cell cyst stage, but  
293 are high in the 16-cell cyst stage and throughout later oogenesis (Supplemental Fig.  
294 S2G-G2') (Xin et al. 2013; Sugimura and Lilly 2006; Webster et al. 1997). Thus, we  
295 hypothesized that Pum may regulate *pgc* translation until the 8-cell cyst and Bru  
296 thereafter. We first focused on Pum and its potential role in regulating *pgc* translation  
297 during early oogenesis. Pum requires co-factors to regulate translation and can use  
298 distinct partners and thus multiple mechanisms. Pum is known to recruit Nos and Twin,  
299 a deadenylase, to NRE-containing 3' UTRs to induce poly(A)-tail shortening in  
300 *Drosophila* embryonic germ cells (Sonoda and Wharton 1999; Kadyrova et al. 2007).  
301 During oogenesis Twin is ubiquitously expressed (Temme et al. 2010; Joly et al. 2013)  
302 and Nos protein is present in all stages, except for in the pre-CB where Pgc is  
303 expressed (Supplemental Fig. S3A-B1) (Forbes and Lehmann 1998; Li et al. 2009). We  
304 therefore hypothesized that Pum, might be regulating Pgc expression with Nos and  
305 Twin only until the cyst stages, during which time a drop in Nos expression in the pre-  
306 CBs would allow for Pgc expression there.

307

308 To test this hypothesis, we separately assayed for PgcGFP expression in *pum*, *nos* and  
309 *twin* mutants. We observed that in the absence of each of these genes, the reporter was  
310 ectopically expressed in the GSCs, as marked by pMAD, and in 2- and 4-cell cysts (Fig.

311 3A-D1, Supplemental Fig. S3C-F). Ectopic expression in the GSCs was also observed  
312 upon germline depletion of *pum*, *nos* and *twin* via RNAi (Supplemental Fig. S3G-I, L).  
313 Twin is a deadenylase and is part of the CCR4-Not complex (Morris 2005; Temme et al.  
314 2010; Chicoine et al. 2007; Temme et al. 2014; Fu et al. 2015). To determine if other  
315 members of this complex were also involved in regulating the *pgc* 3'UTR, we depleted  
316 Pop2 and Not1 in the germ line using RNAi and assayed for GFP expression.  
317 Compared to *pgcGFP*, depletion of Pop2 and Not1 resulted in ectopic expression of the  
318 reporter from the GSCs to the 4-cell cysts consistent with what we observed in the *nos*,  
319 *pum*, and *twin* mutants (Supplemental Fig. S3J-L). We also observed that loss of *pum*  
320 and *twin* results in an elevated GFP expression in the 8-cell cyst. Based on these  
321 immunofluorescence (IF) experiments, we generated a developmental profile to show  
322 the temporal loss of translational regulation of GFP at each stage of development in  
323 *pum*, *nos* and *twin* when compared to control *pgcGFP* ovarioles (Fig. 3E). Taken  
324 together we can conclude that *pgc* is regulated by Nos, Pum and Twin from GSCs to  
325 the 4-cell cyst stage via the CCR4-Not complex. In the pre-CB, when Nos is absent,  
326 Pgc is expressed even though Pum and Twin proteins are still present. This suggests  
327 that Pum and Twin alone are not sufficient for regulating *pgc* in the pre-CB and require  
328 the presence of their co-regulator Nos.

329  
330 To test if Pum and Nos control translation of *pgc* mRNA by shortening poly(A)-tail  
331 length, as would be expected given the CCR4-Not complex's role in deadenylation, we  
332 utilized the poly(A)-tail length (PAT) assay (Sallés and Strickland 1999). We performed  
333 this assay on RNA extracted from GSC-enriched tumors and GSC tumors depleted of  
334 Nos and Pum to eliminate the stage of oogenesis in which *pgc* is translationally  
335 repressed. In the absence of these RBPs, we detected an increase in the length of the  
336 poly(A)-tail compared to the control (Fig. 3F). Together, these observations suggest that  
337 Pum, Nos and Twin are recruited to *pgc*'s 3'UTR to suppress its translation in the GSCs  
338 by a mechanism that involves shortening of its poly(A)-tail.

339  
340 We next asked if this regulation of *pgc* by Pum, Nos and Twin is biologically meaningful.  
341 Loss of *pum* and *nos* results in failure to maintain GSCs, and this defect is thought to be

342 the result of dysregulation of differentiation-promoting mRNAs in the GSCs (Forbes and  
343 Lehmann 1998; Wang and Lin 2005; Gilboa and Lehmann 2004b; Joly et al. 2013). We  
344 have previously shown that *pgc* promotes timely differentiation in the pre-CBs where it  
345 is expressed (Flora et al. 2018). Thus, we hypothesized that in *nos*, *pum* and *twin*  
346 mutants, Pgc is upregulated in the GSCs, forcing the cells to prematurely differentiate  
347 and resulting in a loss of GSCs. To test this hypothesis, we made double mutants of *pgc*  
348 with *nos*, *pum* and *twin* respectively. Lowering *pgc* levels in all three mutants  
349 significantly increased the number of GSCs being maintained (Supplemental Fig. S3M-  
350 S). Together, our results suggest that Pgc is translationally repressed by Pum, Nos and  
351 Twin in the GSCs to ensure appropriate GSC self-renewal and maintenance.

352

### 353 **Me31B cooperates with the decapping protein dGe-1 and *pgc* 5'UTR to mediate** 354 **repression in the GSCs and early differentiating cysts**

355 Our results suggest that Pum, Nos and Twin regulate *pgc* translation via a conserved  
356 sequence in the *pgc* 3'UTR. However, we also found a requirement for the *pgc* 5'UTR in  
357 the regulation of *pgc* in undifferentiated cells (Fig. 1G). How could the 5'UTR and 3'UTR  
358 of *pgc* cooperate to mediate repression? It has been shown that recruitment of the  
359 CCR4-NOT complex also facilitates the recruitment of the de-capping complex to the  
360 5'UTR of mRNAs (Meyer et al. 2010; Garneau et al. 2007; Behm-Ansmant et al. 2006),  
361 and that these two complexes at the 5' and 3'UTR can be bridged by an RNA helicase,  
362 DDX6, or Maternal Expression at 31B (Me31B) (Rouya et al. 2014; Ozgur et al. 2015;  
363 Nakamura et al. 2001; Fenger-Grøn et al. 2005). This allows “masking” of the mRNAs,  
364 making them inaccessible to the ribosome. We therefore hypothesized that Pum, Nos  
365 and Twin at the *pgc* 3'UTR could recruit de-capping complex members, such as EDC4  
366 or *Drosophila* Ge-1 (dGe-1), to the cap at the 5'UTR to promote translational repression  
367 by masking through the bridging action of Me31B (Fan et al. 2011; Eulalio et al. 2007).

368

369 To test this model, we first asked if Me31B associates with *pgc* mRNA. We used a  
370 Me31B protein-GFP trap construct and carried out an IP experiment with both anti-GFP  
371 and anti-IgG antibodies, in lysates from wild-type and Me31B-GFP trap transgenic  
372 ovaries; thereafter we analyzed *pgc* mRNA association using qRT-PCR. We found that

373 there was a significant enrichment of *pgc* mRNA bound to Me31B-GFP protein when  
374 compared to IgG IP from the same lysate sample (Fig. 4A). The levels of enrichment  
375 were comparable to those of the positive control, *osk* mRNA, which is known to  
376 associate with Me31B. Next, we assayed for *pgcGFP* expression upon germline  
377 depletion of *me31B* and *dGe-1* and found a loss of GFP repression from the GSC to the  
378 4-cell cyst stage in the presence of *me31B* RNAi and from the GSC to the 8-cell cyst  
379 stage for the *dGe-1* RNAi (Fig. 4B-E, Supplemental Fig. 4A). Our results suggest that  
380 *pgc* 5' and 3'UTRs are bridged by a network of RBPs including Me31B and proteins of  
381 the decapping complex such as dGe-1 to prevent its translation.

382

### 383 **Pum and its co-factor Brat regulate Pgc translation in the 4- to 16-cell cysts**

384 Pum can also mediate translational repression via an alternate mechanism by recruiting  
385 Brat (Sonoda and Wharton 2001; Muraro et al. 2008; Olesnický et al. 2012; Harris et al.  
386 2011). Brat engages the cap-binding protein, d4EHP, which competes with the usual  
387 cap-binding protein eIF4E, to prevent translational initiation (Cho et al. 2005). Pum is  
388 present from the GSCs until the 8-cell cyst and is attenuated from the 16-cell cyst stage  
389 onward while Brat is expressed only after the CB differentiates and persists throughout  
390 all later cyst stages (Carreira-Rosario et al. 2016; Harris et al. 2011). To test if Pum  
391 regulates *pgc* via Brat, we assayed for *pgcGFP* expression in the *pum*<sup>680</sup> mutant, a  
392 separation-of-function mutant that disrupts the interaction between Pum and Brat  
393 without affecting the interaction between Pum and Nos (Wharton et al. 1998; Sonoda  
394 and Wharton 1999). We found that in *pum*<sup>680</sup> mutants, there was ectopic *pgcGFP*  
395 reporter expression from 4- to 16-cell cyst but not in the earlier stages (Fig. 5A-B1, E,  
396 Supplemental Fig. S5A). This observation suggested that Pum may be interacting with  
397 Brat and its partner d4EHP to repress *pgc* translation in the differentiating cysts. This to  
398 test this, we depleted *brat* and *d4EHP* in the germ line using RNAi. We observed that  
399 loss of Brat and d4EHP also results in ectopic expression of GFP from 4- to 16-cell cyst  
400 but not in the earlier stages (Fig. 5C-E, Supplemental Fig. S5A). To determine whether  
401 this mode of regulation affected the poly(A)-tail length of *pgc*, we performed a PAT  
402 assay on *pgc* RNA in *pum*<sup>680</sup> mutants and germline depletions of *brat* and *d4EHP*. We  
403 observed no significant change in *pgc* poly(A)-tail length in *pum*<sup>680</sup> mutants and upon

404 depletion of *d4EHP* and *brat* when compared to the control (Supplemental Fig. S5B). A  
405 developmental profile of GFP expression in *pgcGFP*, *pgcGFP; pum<sup>680</sup>*, *pgcGFP;*  
406 *nosGAL4>bratRNAi* and *pgcGFP; nosGAL4>d4EHPRNAi* shows that compared to the  
407 control, loss of Brat and d4EHP results in the loss *pgcGFP* regulation restricted from the  
408 4- to 16-cell cysts (Fig. 5E). These results suggest that Pum not only switches binding  
409 partners but also the mode of regulation from a poly(A)-tail dependent mechanism to  
410 cap dependent mechanism to regulate *pgc* translation pre- and post-differentiation,  
411 respectively.

412

### 413 **Bru and Cup regulate Pgc translation in the later stages of oogenesis**

414 After differentiation, levels of Pum diminish and levels of Bru increase (Fig. S2G-G2').  
415 We have shown that Bru binds to the 10-nt conserved sequence in the 3'UTR that is  
416 required for *pgc* translational control throughout oogenesis (Fig. 2C, F). Therefore, we  
417 asked if Bru and its binding partner Cup can repress Pgc translation post-differentiation  
418 (Nakamura et al. 2004; Chekulaeva et al. 2006; Kim et al. 2015b). Assaying for the *pgc*  
419 reporter in both *bru* mutants and germline depletion of Bru via RNAi we found that  
420 translation was de-repressed primarily from the 16-cell cyst stage onwards (Fig. 6A-B1,  
421 Supplemental Fig. S6A-B). To determine if Bru recruits Cup to mediate this regulation,  
422 we depleted *cup* in the germ line via RNAi, and observed similar ectopic expression of  
423 GFP from the 16-cell cyst stage (Fig. 6C). A developmental profile of GFP expression in  
424 *pgcGFP; nosGAL4*, *pgcGFP; nosGAL4>brunoRNAi* and *pgcGFP; nosGAL4>cupRNAi*  
425 shows that compared to the control, loss of *bru* and *cup* results in the loss *pgcGFP*  
426 regulation primarily from the 16-cell cyst stage onwards (Fig. 6D). To test if Bru and  
427 Cup's mode of regulation affected the poly(A)-tail length of *pgc*, we performed a PAT  
428 assay on *pgc* RNA in germline depletion of Bru and Cup. We observed that Bru and  
429 Cup depletion results in a dramatic increase of *pgc* poly(A)-tail length (Fig. 6E). As loss  
430 of components of the CCR4-Not complex do not show loss of translational control in  
431 later stages and poly(A)-tail length increase has been shown to be directly correlated to  
432 increased translational efficiency (TE) (Eichhorn et al. 2016; Sachs and Wahle 1993),  
433 we favor the model that *pgc* is regulated in the differentiated stages by Bru and its



434 binding partner Cup via a cap dependent mechanism that restricts access to both cap  
435 and poly-adenylation machinery.

436

### 437 **A class of germline RNAs are similarly regulated by both Pum and Bru**

438 Our results show that the conserved RBPs Pum and Bru can recognize and bind the  
439 same cis-element in the *pgc* 3'UTR to mediate repression throughout oogenesis. We  
440 wondered if this mechanism could be generally applicable for the regulation of  
441 maternally deposited mRNAs present in the ovary. To address this, we carried out a  
442 Polysome-seq (Poly-seq) experiment that has been successfully used in prior studies to  
443 calculate the translational efficiency (TE) of transcripts (Kronja et al. 2014). TE is a  
444 measure of actively translating mRNAs, which is achieved by calculating the ratio of  
445 mRNA present in the polysome fraction to the mRNA present in the input. Therefore, we  
446 utilized this method to identify transcripts that are being inefficiently repressed or being  
447 actively translated in the ovaries of *nosGAL4>pumRNAi* and *nosGAL4>bruRNAi* flies  
448 when compared to young *nosGAL4* flies. We used young *nosGAL4* ovaries as a control  
449 because they do not have mature later stages (stage 10 and onwards) and thus present  
450 a similar profile of ovariole stages to those found upon the germline depletion of both  
451 Pum and Bru. We conducted RNA-seq of transcripts extracted from the polysome  
452 fractions as well as RNA-seq from input RNA and calculated the average TE of all the  
453 transcripts in the control and upon germline depletion of Pum and Bru (Supplemental  
454 Fig. S7A). We found that when Pum and Bru are depleted in the germline, 1081 and  
455 908 transcripts have higher TE respectively than in the control (Fig. 7A-C). 436 of these  
456 transcripts display an increase in TE when either *pum* or *bru* is depleted suggesting that  
457 these targets may be co-regulated by them (Fig. 7C). 368 of the 436 transcripts and 179  
458 of the 212 transcripts are maternally provided mRNAs that are also present in mature  
459 eggs (Kronja et al. 2014). 212 of the 436 shared transcripts contained a sequence that  
460 was similar to the 10-nt PRE/BRE sequence identified in the *pgc* 3'UTR (Supplemental  
461 Fig. S7B). Gene Ontology analyses of these 212 shared targets show that these genes  
462 are required for gastrulation and cell motility; processes that are mediated by maternally  
463 deposited RNAs and occur prior to the maternal-to-zygotic transition of *Drosophila*  
464 embryogenesis (Fig. 7D). One such gene that was identified to be co-regulated by Pum



465 and Bru throughout oogenesis was *zelda*, a maternally provided mRNA that plays the  
466 role of a master regulator during early *Drosophila* embryogenesis (Fig. 7A-B) (Harrison  
467 et al. 2011; Nien et al. 2011; Liang et al. 2008). It is a transcription factor that is required  
468 to activate early-developmental somatic genes essential for cellularization, sex  
469 determination and body patterning. We do not know if these maternal mRNAs are  
470 expressed in the CBs, like *pgc*, or if additional translational regulatory mechanisms  
471 silence these mRNAs there. Taken together, our results demonstrate that key  
472 determinants for somatic and germ line fate, such as *zelda* and *pgc* respectively are  
473 translationally suppressed by Pum and Bru to ensure their repression during oogenesis.

474

## 475 **Discussion**

476 Here we report that a maternal mRNA, *pgc*, is translationally repressed via different  
477 temporally restricted RBPs using the same cis-acting sequence during oogenesis. We  
478 find that both the *pgc* 5' and 3'UTRs work in conjunction to regulate translation in the  
479 earliest stages of oogenesis. In contrast, during later differentiated stages of oogenesis  
480 only the 3'UTR of *pgc* is necessary and sufficient for its translational regulation. We find  
481 that a 10-nt conserved sequence in this 3'UTR is essential for *pgc* regulation during the  
482 entirety of oogenesis. Surprisingly, two distinct RBPs, Pum and Bru, whose expression  
483 is temporally restricted, both recognize and bind this conserved sequence and recruit  
484 other cofactors to regulate the mRNA. We find that such regulation is not unique to *pgc*,  
485 but that a large class of maternal mRNAs also lose translational control in the absence  
486 of both Pum and Bru. Our results indicate that 212 members of this class of mRNAs  
487 also share in their 3'UTR a version of the 10-nt conserved sequence necessary for Pum  
488 and Bru regulation of *pgc*. These findings suggest that we have identified a broadly  
489 utilized mechanism that prevents the translation of specific mRNAs during oogenesis.  
490 The fact that some of these mRNAs affect gastrulation and developmental patterning  
491 argues that this mechanism evolved to prevent the translation of protein products, which  
492 could be deleterious during oogenesis, from mRNAs that must be produced during  
493 oogenesis to allow their deposition into the egg to govern the key early steps of  
494 embryogenesis.

495

496 We find that a dynamic landscape of translational regulators has evolved to allow fine  
497 scale control of maternal mRNAs. mRNAs can be regulated either through shortening of  
498 the poly(A)-tail mediated by the CCR4-Not complex or through interfering with cap  
499 recognition by either the decapping machinery or proteins that bind the cap (Meyer et al.  
500 2010; Garneau et al. 2007; Temme et al. 2014). CCR4-Not complex members as well  
501 as decapping machinery proteins are expressed continuously during *Drosophila* germ  
502 line development and thus cannot mediate dynamic translational control on their own  
503 (Temme et al. 2010; Joly et al. 2013; Fan et al. 2011; Temme et al. 2004). However,  
504 carefully choreographed expression of specific RBPs that recognize and bind  
505 sequences in the UTRs recruit these regulatory proteins to target transcripts at different  
506 stages. Our studies show that Pum, whose expression is restricted to the earliest stages  
507 of oogenesis, associates with Nos to recruit the CCR4–Not complex to regulate *pgc*  
508 mRNA in the GSCs. After differentiation, Pum switches binding partners and complexes  
509 with Brat, a protein only expressed in the differentiating stages, and an adaptor protein,  
510 d4EHP, which binds to the mRNA cap to mask *pgc* transcript from the translation  
511 initiation factors. As Pum levels diminish, this mode of regulation is handed over to Bru,  
512 which is robustly expressed from the 16-cell cyst and onwards, and its partner Cup,  
513 which binds to eIF4E to mask *pgc* transcript from the translation initiation factors. Thus,  
514 we posit that by utilizing temporally restricted RBPs that can bind the 3'UTR in a  
515 combinatorial fashion, the germ line can sculpt differential expression of maternal  
516 mRNAs. Surprisingly, we find that for *pgc* mRNA this fine scale translation regulation is  
517 mediated by a single conserved sequence in its 3'UTR.

518

519 Why does *pgc* use one sequence to bind two trans-acting factors as opposed to utilizing  
520 two distinct sequences to bind Pum and Bru independently? Pum recruits Brat, which  
521 complexes with d4EHP, that binds the cap to prevent the initiation machinery from  
522 accessing the mRNA. Bru recruits Cup which binds eIF4E to prevent the translation  
523 initiation machinery from accessing the mRNA. If Pum and Bru are present at the same  
524 time, as in the 8-16 cell cyst stage, and bind to different sequences, they will recruit two  
525 proteins that have to compete to bind to the mRNA cap. As d4EHP can out compete  
526 eIF4E, which is ubiquitously present in all cells, in the presence of Pum, the hand off

527 from Pum to Bru would become difficult. How then is repression of *pgc* mRNA  
528 seamlessly handed off from one RBP to another? We observe an overlap for repression  
529 mediated by Pum and its two distinct partner complexes in the 4- and 8-cell cysts  
530 (Supplemental Fig. S7C). Pum partners with Nos, Twin, Me31B and dGe-1 to repress  
531 *pgc* from the GSCs to 8- cell cyst stage while it partners with Brat and d4EHP to  
532 regulate *pgc* from the 4- to 16- cell cysts stages (Fig. 7E, Supplemental Fig. S7C). Pum  
533 and Bru mediated repression overlap in the 8- and 16-cell cyst stage (Fig. 7E,  
534 Supplemental Fig. S7C) We hypothesize that to maintain seamless translational  
535 regulation during the 4- to 16- cell cyst stages RBPs compete to bind the same cis-  
536 element of their target mRNAs. When levels of one RBP diminish and those of another  
537 RBP increase, the RBP present at a lower concentration could be displaced from its  
538 binding site on the mRNA, allowing for a smooth transition. Thus, we favor the idea that  
539 seamless transitions are mediated by overlapping trans-acting factor regimes and  
540 competition for the binding site.

541  
542 *pgc* is transcribed continuously from GSC stage onwards and accumulates in the oocyte  
543 post differentiation. We find that there is a switch in the mode of *pgc* regulation from a  
544 Twin (CCR4)-dependent mechanism mediated by Pum which can destabilize mRNAs in  
545 the GSCs to a Twin (CCR4)-independent mode mediated by Bru in the later  
546 differentiated stages. Loss of Bru during oogenesis results in a dramatic increase in  
547 poly-adenylation of the *pgc* mRNA as well as translation of Pgc. This suggests that Bru  
548 mediated regulation not only translationally represses *pgc* mRNA during oogenesis but  
549 could maintain it in a state poised for poly-adenylation and translation. We also show  
550 that this mode of regulation is not unique to *pgc*, and that there is a subset of maternally  
551 deposited germ line mRNAs including *zelda* that seem to be regulated similarly. *zelda*, a  
552 transcription factor that activates the zygotic genome is expressed at low levels in early  
553 embryos and increases as development proceeds concurrent with attenuation of Bru  
554 levels (Harrison et al. 2011; Nien et al. 2011; Webster et al. 1997). We hypothesize that  
555 post-differentiation it is advantageous to switch the mode of regulation primarily to a cap  
556 dependent mechanism mediated by proteins such as Bru to preserve and protect a  
557 class of germ line mRNAs that are required to establish the next generation. This

558 guarantees not only seamless translational repression throughout oogenesis, but also  
559 serves as an effective strategy to protect and prime these mRNAs to be translated and  
560 thus produce the proteins required for early embryonic development.

561  
562 During mammalian development, maternally synthesized mRNAs are deposited into the  
563 egg to support embryonic development and these maternal mRNAs also need to be  
564 translationally regulated. Pum and CELF/Bruno-like proteins are both expressed in the  
565 mammalian germ line and are required for fertility (Mak et al. 2016; Moore et al. 2003;  
566 Mak et al. 2013; Kress et al. 2007). The mammalian homologs of Pum, PUMILIO 1 and  
567 2 (PUM 1 and 2) also bind to a sequence similar to the *Drosophila* NRE, and  
568 CELF1/Bruno-like proteins bind to an “EDEN” sequence similar to *Drosophila* BREs  
569 (Jenkins et al. 2009; Wang et al. 2001; Vlasova et al. 2008). PUM and CELF/Bruno-like  
570 proteins not only play critical roles in the germ line but also required for the development  
571 and function of other organs (Siemen et al. 2008; Spassov and Jurecic 2003; Barreau et  
572 al. 2006). Both PUM 1, 2 and CELF/Bruno-like proteins are expressed and are required  
573 for the proper development of the central nervous system in mice (Meins et al. 2002;  
574 Siemen et al. 2011; Wagnon et al. 2011; Zhang et al. 2017). Whether Pum and Bru  
575 function together on similar targets in the mammalian germ line and nervous system as  
576 they do in the *Drosophila* ovary is not known. Our data suggests that such a hand off  
577 mechanism could be acting in these vertebrate systems as well.

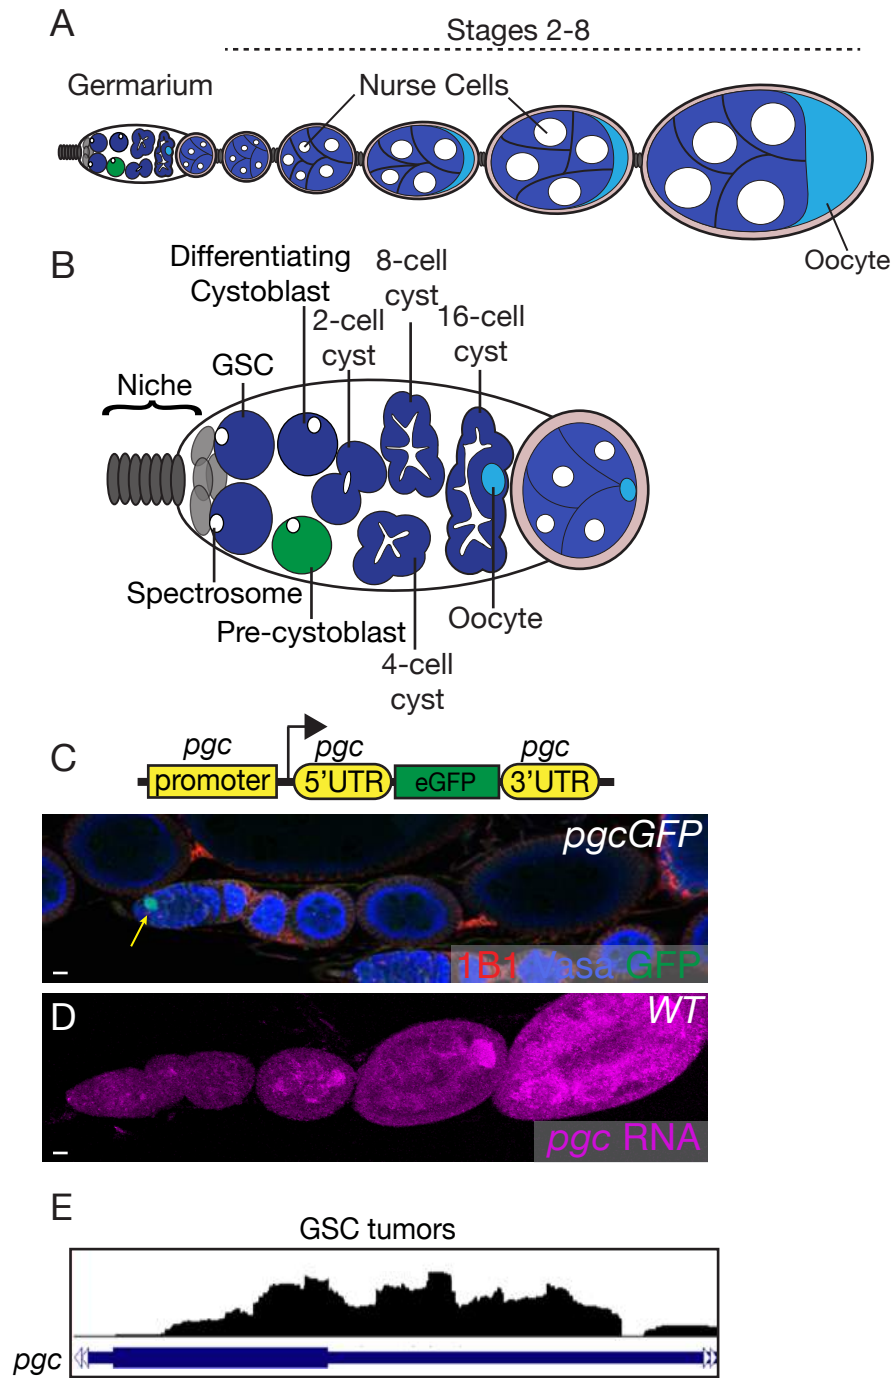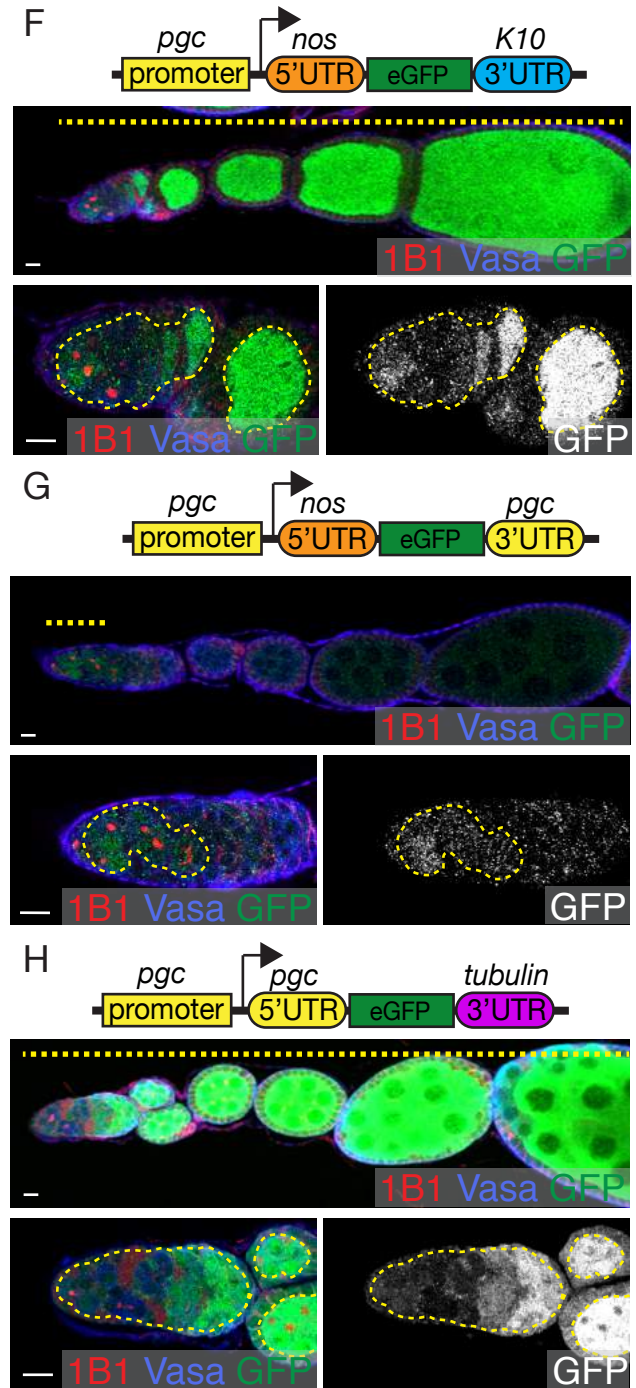

**Figure 1. Pgc is translationally regulated via its UTRs.** (A) Schematic representation of a female *Drosophila* ovariole. The *Drosophila* ovary is composed of 16-18 ovarioles, each of which is an assembly line of egg chambers at 14 different stages. Each chamber is encapsulated by somatic follicle cells and contains fifteen nurse cells that provide mRNAs and proteins to the developing oocyte. (B) A schematic representation of a germarium that is present at the anterior most tip of the ovariole. The germline stem cells (GSCs) marked in blue are supported and maintained by the somatic niche marked in gray. Each GSC divides asymmetrically to give rise to a pre-cystoblast (pre-CB), shown in green. The pre-CB then turns on a differentiation factor, *bag-of-marbles* (*bam*) and undergoes four incomplete mitotic divisions to give rise to a 16-cell cyst. The single cell of the germarium can be identified by the circular structure called the spectrosome and the differentiating cysts can be identified by the branched structures called fusomes. One of the cells from the 16-cell cyst becomes the oocyte (light blue) while the other fifteen become the nurse cells. (C) The ovariole of a transgenic fly created by fusing GFP to the *pgc* 5' and 3'UTR under the control of the *pgc* promoter was stained with 1B1 (red), Vasa (blue) and GFP (green). Expression of GFP is restricted to the pre-CB in the germarium. (D) The ovariole of a wild-type fly probed for *pgc* RNA (magenta) using FISH, shows that *pgc* RNA is present throughout oogenesis, with increasing levels being deposited in the developing oocyte. (E) RNA-seq track of *pgc* in *nos-GAL4>UAS-tkv* ovaries show *pgc* RNA is transcribed in the GSCs. (F) The ovariole of a transgenic fly created by fusing GFP to the *nos* 5' and *K10* 3'UTR under the control of the *pgc* promoter was stained with 1B1 (red), Vasa (blue) and GFP (green). GFP expression shows that the promoter is active in the GSCs. (G) The ovariole of a transgenic fly created by fusing GFP to *nos* 5' and *pgc* 3'UTR under the control of the *pgc* promoter was stained with 1B1 (red), Vasa (blue) and GFP (green). There is a loss of GFP regulation only in the earliest stages of oogenesis. (H) The ovariole of a transgenic fly created by fusing GFP to the *pgc* 5' and *tub* 3'UTR and under the control of the *pgc* promoter was stained with 1B1 (red), Vasa (blue) and GFP (green). There is a loss of GFP regulation throughout oogenesis, including at the earliest stages. Scale bars: 10µm.



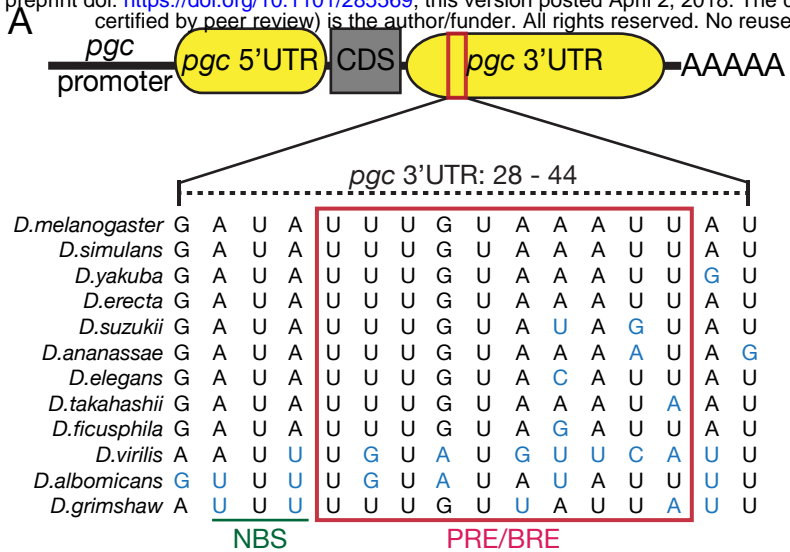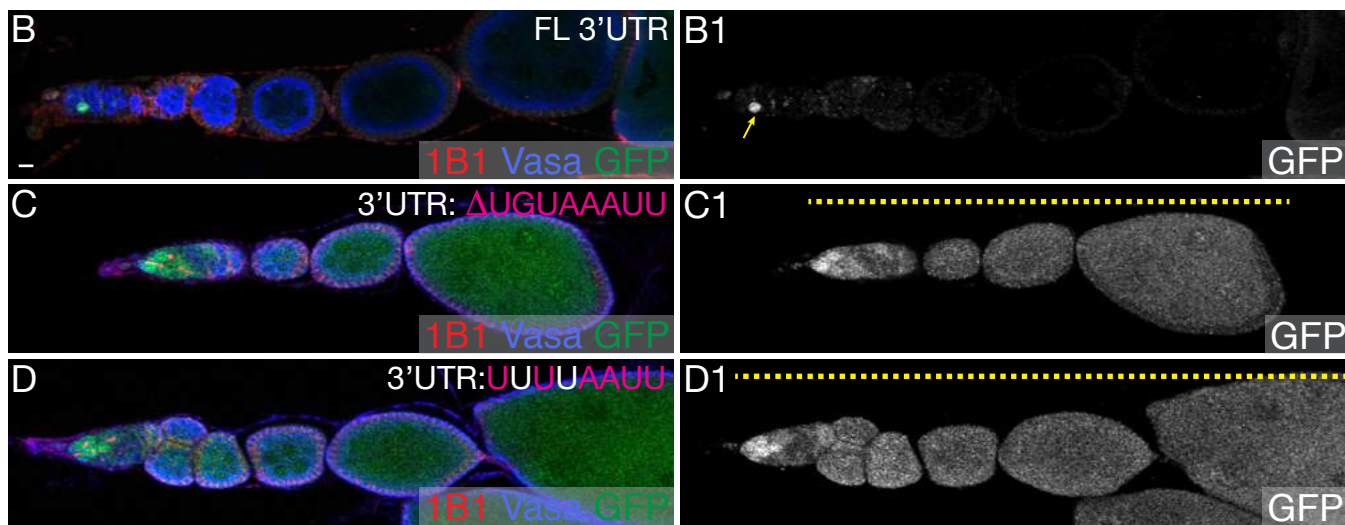

**E**

|                | GSC | CB | 2-cell | Cyst | 4-cell | Cyst | 8-cell | Cyst | 16-cell | Cyst | Stage 1-9 |
|----------------|-----|----|--------|------|--------|------|--------|------|---------|------|-----------|
| FL 3'UTR       | □   | ■  | □      | □    | □      | □    | □      | □    | □       | □    | ■         |
| 3'UTR: ΔUGUAAA | ■   | ■  | ■      | ■    | ■      | ■    | ■      | ■    | ■       | ■    | ■         |
| 3'UTR: UUUUAAU | ■   | ■  | ■      | ■    | ■      | ■    | ■      | ■    | ■       | ■    | ■         |
| 3'UTR: UCUCAAU | ■   | ■  | ■      | ■    | ■      | ■    | ■      | ■    | ■       | ■    | ■         |
| 3'UTR: ΔUGUA   | ■   | ■  | ■      | ■    | ■      | ■    | ■      | ■    | ■       | ■    | ■         |

Legend: ■ GFP expression, □ No GFP expression

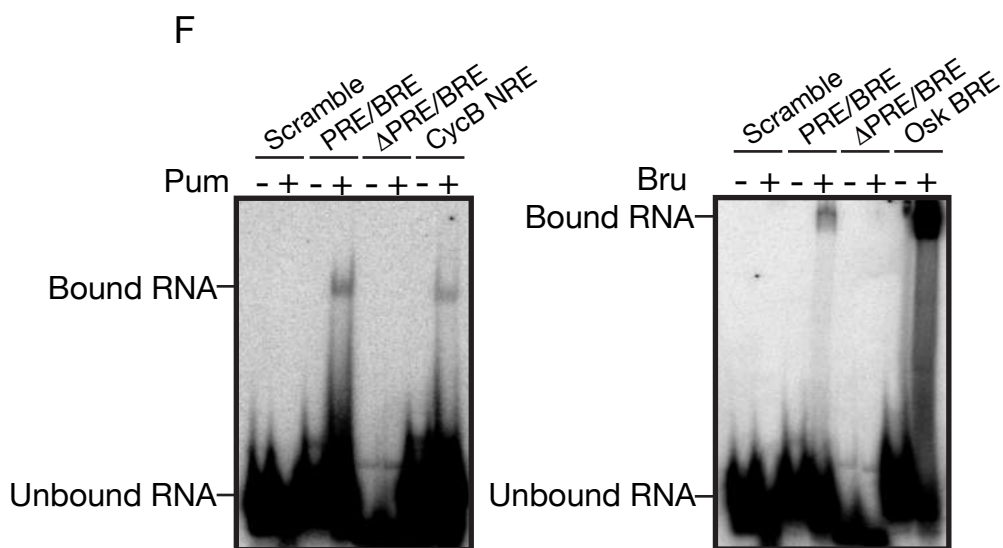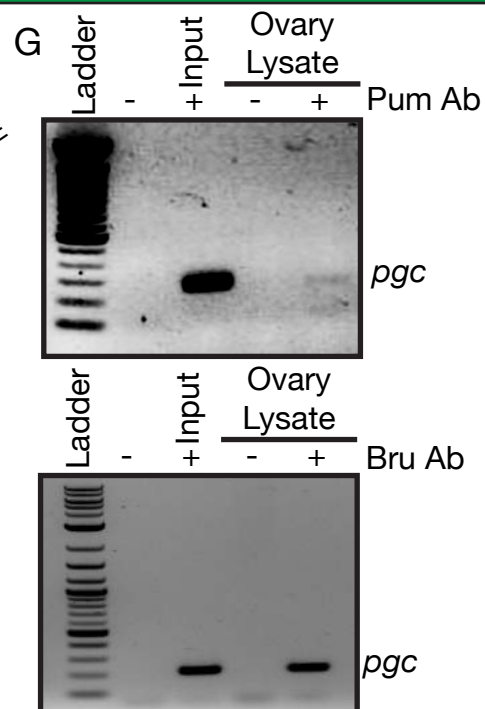



**Figure 2. A cis-element in the *pgc* 3'UTR that binds both Pum and Bru is required for translational control throughout oogenesis** (A) The NBS and PRE/BRE sequence identified in the *pgc* 3'UTR of *Drosophila melanogaster* that can bind Pum and Bru is conserved in 12 species of Drosophilids. (B) The ovariole of a transgenic fly created by fusing GFP to the *pgc* 5' and full length (FL) 3'UTR under the control of the *pgc* promoter was stained with 1B1 (red), Vasa (blue) and GFP (green). GFP reporter and thus normal Pgc expression was restricted to the pre-CB. (C) The ovariole of a transgenic fly created by fusing GFP to the *pgc* 5' and PRE/BRE sequence deleted 3'UTR (3'UTR:ΔUGUAAAUU) under the control of the *pgc* promoter was stained with 1B1 (red), Vasa (blue) and GFP (green). A loss of GFP regulation was observed throughout oogenesis in the absence of the PRE/BRE sequence. (D) The ovariole of a transgenic fly created by fusing GFP to the *pgc* 5' and 3'UTR (3'UTR: UUUUAAUU) where the UGUA core motif was mutated to UUUU and driven under the control of the *pgc* promoter was stained with 1B1 (red), Vasa (blue) and GFP (green). A loss of GFP regulation was observed throughout oogenesis when the UGUA sequence in the PRE was mutated to UUUU. (E) A developmental profile of GFP expression in different stages of oogenesis in transgenes where the PRE sequence was either deleted or mutated (3'UTR:ΔUGUAAAUU, 3'UTR: UUUUAAUU, 3'UTR: UCUCAAUU and 3'UTR: ΔUGUA) compared to FL 3'UTR. (F) EMSA shows that purified recombinant RNA binding domain of Pum protein binds to the PRE/BRE of *pgc* 3'UTR sequence *in vitro*. A scrambled RNA sequence shows no binding while the NRE sequence from the *CycB* 3'UTR shows binding. EMSA shows that purified full length recombinant Bru protein binds to the PRE/BRE sequence of *pgc* 3'UTR *in vitro*. A scrambled RNA sequence shows no binding while the BRE sequence from the *Osk* 3'UTR shows binding. (G) RT-PCR of *pgc* carried out on RNA samples extracted after an IP experiment with Pum antibody and Bru antibody in wild-type ovary lysate, respectively show that *pgc* RNA associates with Pum and Bru *in vivo*. Scale bars: 10μm.

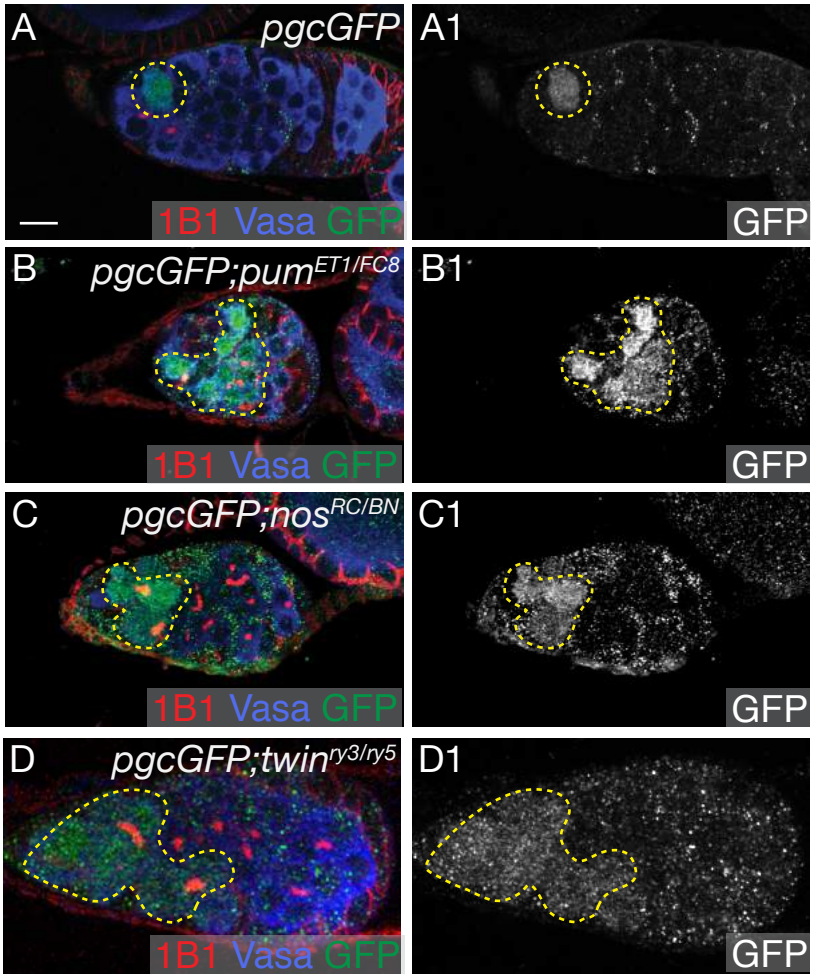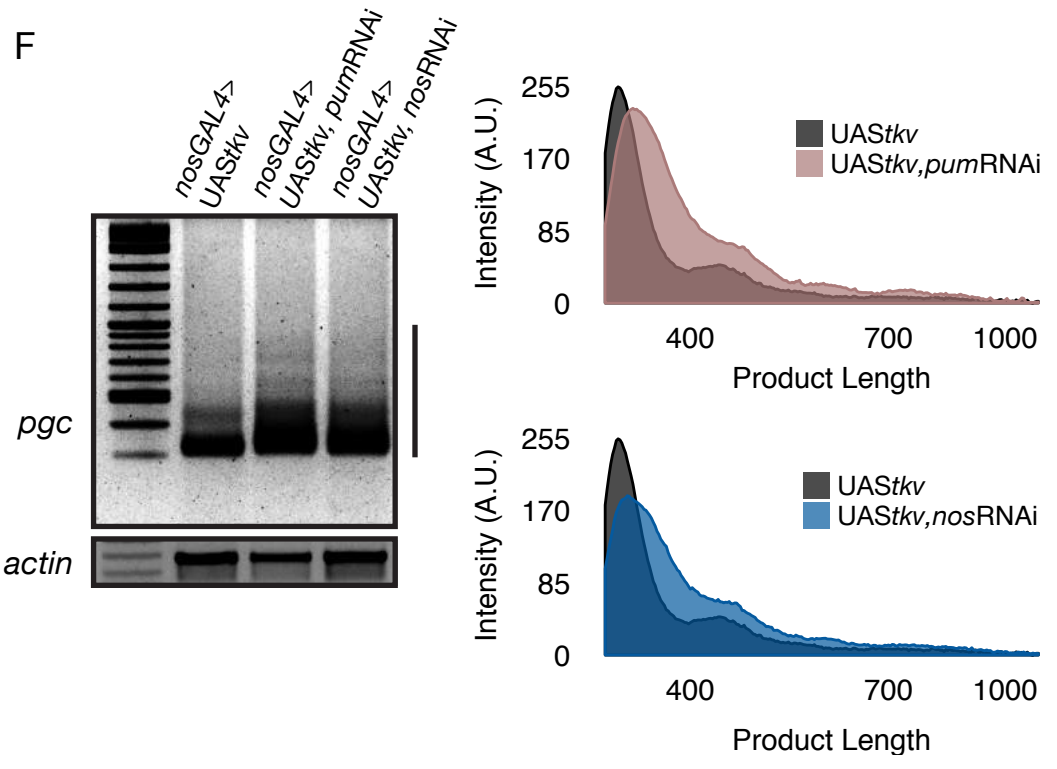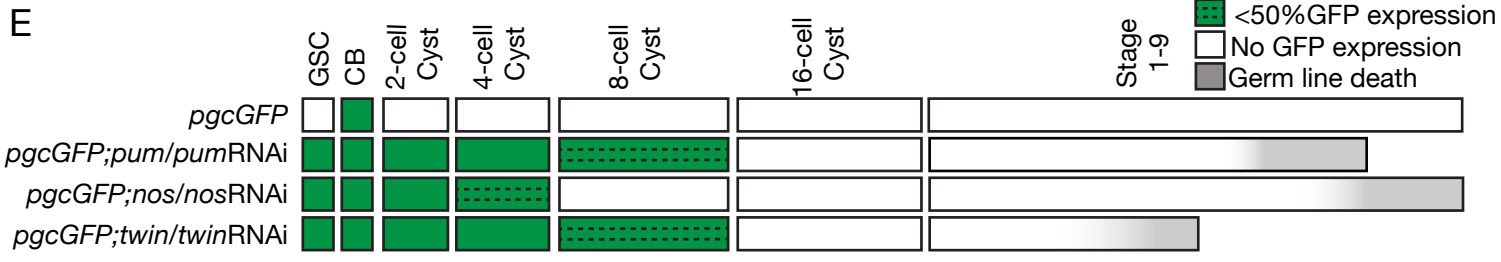

**Figure 3. Pum and its co-factor Nos regulate Pgc translation in the GSCs and early differentiating cysts** (A, A1) The germarium of a *pgcGFP* ovary stained with 1B1 (red), Vasa (blue) and GFP (green) shows expression of GFP only in the pre-CB. GFP channel shown in gray scale in A1. (B, B1) The germarium of a *pgcGFP; pum<sup>ET1/FC8</sup>* mutant ovary stained with 1B1 (red), Vasa (blue) and GFP (green) shows aberrant expression of GFP from the GSCs to the 8-cell cyst (100% from GSC to 4-cell cyst, 32% in 8-cell cyst, n= 25 germaria). GFP channel shown in gray scale in B1. (C, C1) The germarium of a *pgcGFP; nos<sup>RC/BN</sup>* mutant ovary stained with 1B1 (red), Vasa (blue) and GFP (green) displays aberrant expression of GFP from the GSCs to the 4-cell cyst (100% from GSCs to 2-cell cyst, 13% in 4-cell cyst, n= 25 germaria). GFP channel shown in gray scale in C1. (D, D1) The germarium of a *pgcGFP; twin<sup>ry3/ry5</sup>* mutant ovary stained with 1B1 (red), Vasa (blue) and GFP (green) shows aberrant expression of GFP from the GSCs to the 8-cell cyst (100% from GSC to 4-cell cyst, 40% in 8-cell cyst, n= 25 germaria). GFP channel shown in gray scale in D1. (E) A developmental profile of GFP expression in all stages throughout oogenesis in *pgcGFP*, *pgcGFP; pum<sup>ET1/FC8</sup>/pumRNAi*, *pgcGFP; nos<sup>RC/BN</sup>/nosRNAi* and *pgcGFP; twin<sup>ry3/ry5</sup>/twinRNAi* ovarioles shows that GFP regulation is lost during the earliest stages of oogenesis in the absence of Pum and its co-factors. (F) PAT assay analysis of *pgc* poly(A)-tail length in GSC tumors and in GSC tumors lacking Pum and Nos. The absence of Pum and Nos results in a longer *pgc* poly(A)-tail length. Scale bars: 10 $\mu$ m.

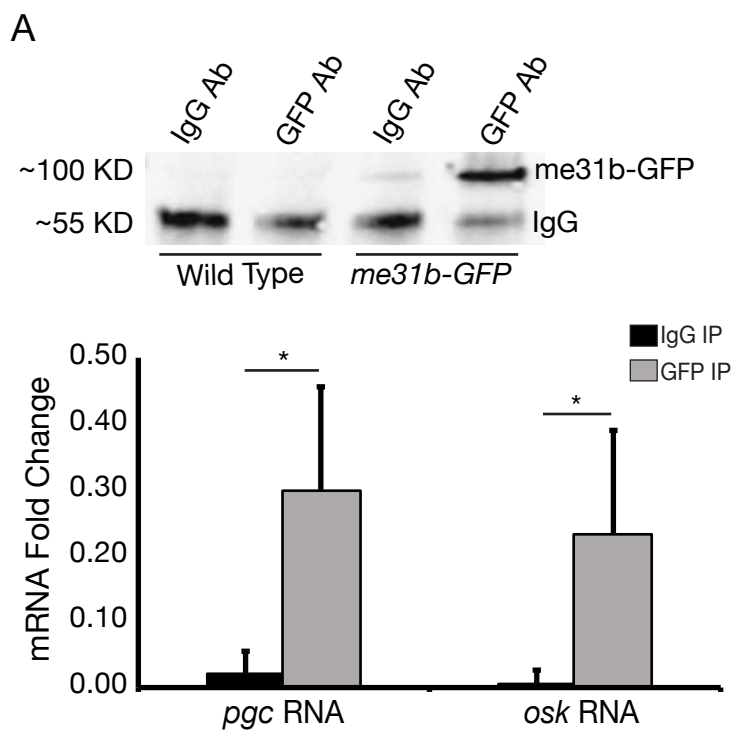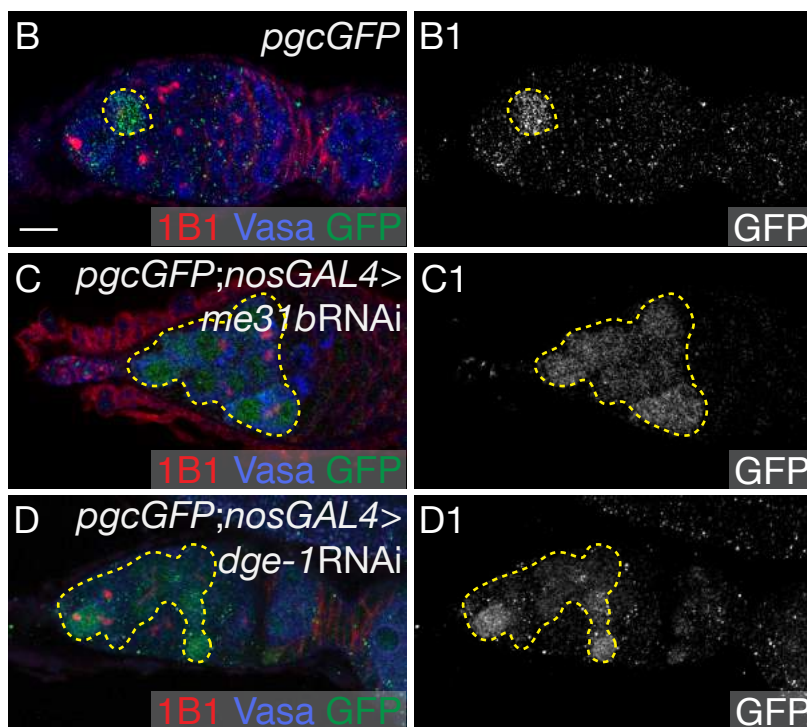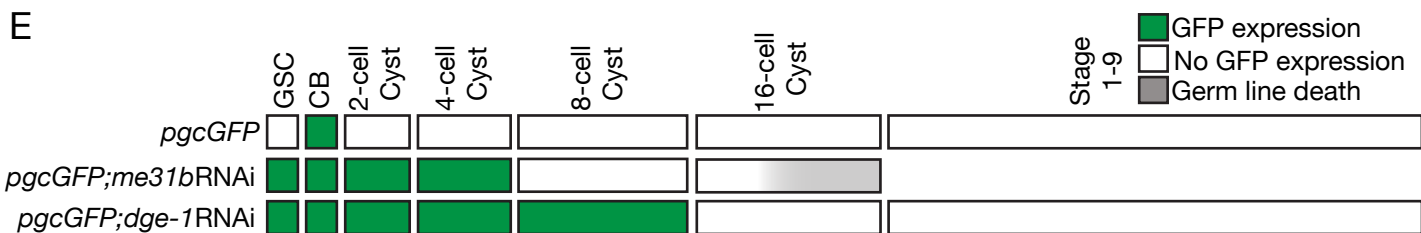

**Figure 4. Me31B cooperates with the decapping protein dGe-1 and *pgc* 5'UTR to mediate repression in the GSCs and early differentiating cysts** (A) An IP experiment carried out with GFP antibody in ovary lysates from *me31bGFP-trap* transgenic flies. qRT-PCR analysis of RNA extracted from the IP samples shows that *pgc* RNA is associated with *me31b* protein *in vivo*, as is the positive control, *osk* RNA. A Student's t-test statistical analysis was performed. \* indicates a p-value <0.05. (B, B1) The germarium of a *pgcGFP* ovary stained with 1B1 (red), Vasa (blue) and GFP (green) shows expression of GFP only in the pre-CB. GFP channel shown in gray scale in A1. (C, C1) The germarium of an ovary with *Me31B* depleted from the germline by RNAi stained with 1B1 (red), Vasa (blue) and GFP (green) shows aberrant expression of GFP in the GSCs to the 4-cell cyst (100% from GSCs to 4-cell cyst, n=20 germaria). GFP channel shown in gray scale in G1. (D, D1) The germarium of an ovary with *ge-1* depleted from the germline by RNAi stained with 1B1 (red), Vasa (blue) and GFP (green) shows aberrant expression of GFP in the GSCs to the 8-cell cyst stages (100% from GSCs to 8-cell cyst, n=20 germaria). GFP channel shown in gray scale in H1. (E) A developmental profile of GFP expression in *pgcGFP*, *pgcGFP; nosGAL4>me31BRNAi*, and *pgcGFP; nosGAL4>dge-1RNAi* ovarioles shows a temporal loss of GFP regulation restricted to the earliest stages of oogenesis. Scale bar: 10µm.

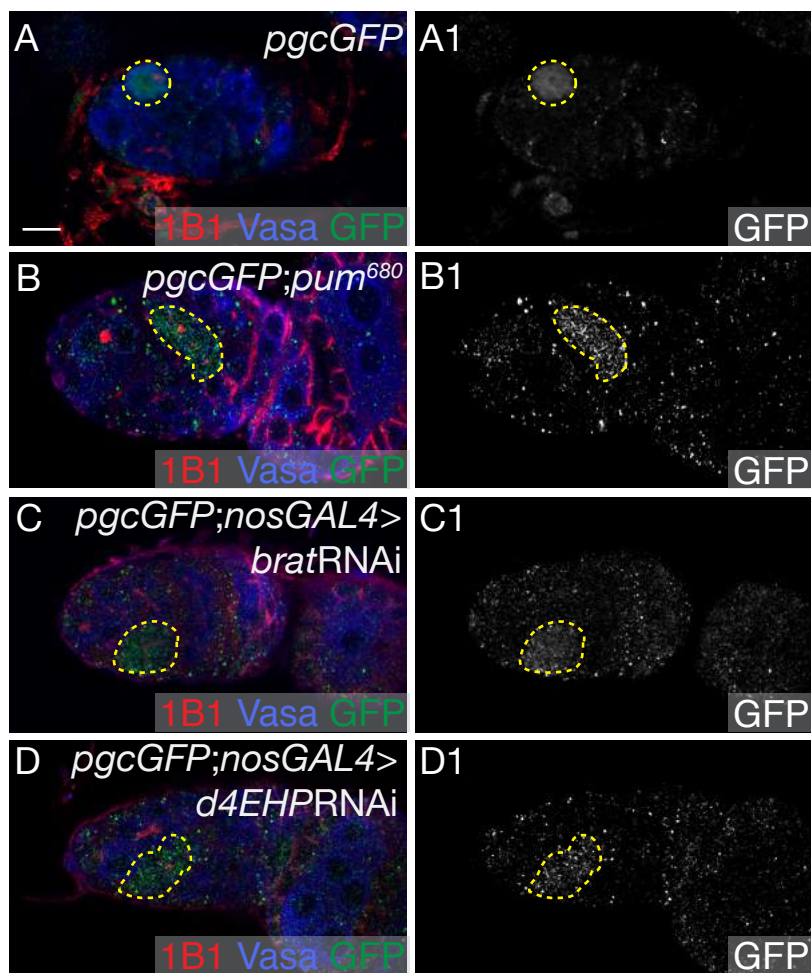

**E**

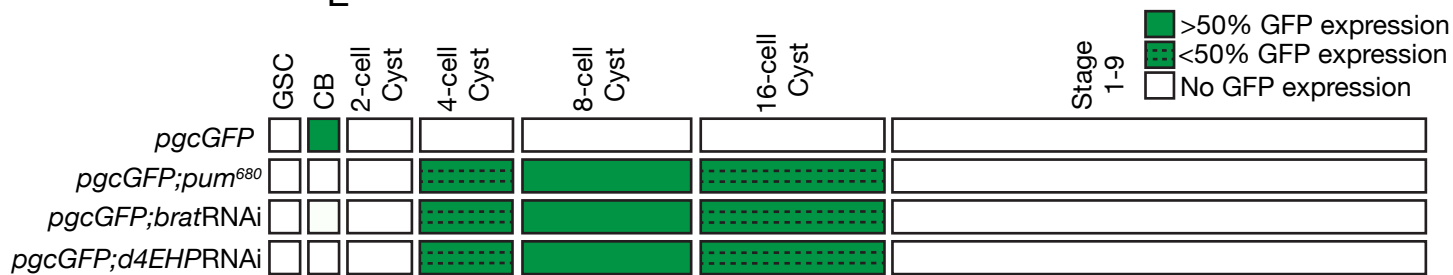



**Figure 5. Pum and its co-factor Brat regulate Pgc translation in the 4- to 16-cell cysts.** (A, A1) The germarium of a *pgcGFP* ovary stained with 1B1 (red), Vasa (blue) and GFP (green) shows expression of GFP only in the pre-CB. GFP channel shown in gray scale in A1. (B, B1) The germarium of a *pum<sup>680</sup>* mutant ovary stained with 1B1 (red), Vasa (blue) and GFP (green) shows aberrant expression of GFP in the differentiating cysts (25% in the 4-cell cyst, 75% in the 8-cell cyst and 10% in the 16-cell cyst, n=20 germaria). GFP channel showed in gray scale in B1. (C, C1) The germarium of an ovary with *brat* depleted from the germline by RNAi stained with 1B1 (red), Vasa (blue) and GFP (green) shows aberrant expression of GFP in the differentiating cysts (38% in the 4-cell cyst, 54% in the 8-cell cyst and 18% in the 16-cell cysts, n=30 germaria). GFP channel shown in gray scale in C1. (D, D1) The germarium of an ovary with *d4EHP* depleted from the germline by RNAi stained with 1B1 (red), Vasa (blue) and GFP (green) shows aberrant expression of GFP in the differentiating cyst stages (34% in the 4-cell cyst, 62% in the 8-cell cyst and 15% in the 16-cell cyst, n=32 germaria). GFP channel shown in gray scale in D1. (E) A developmental profile of GFP expression in *pgcGFP*, *pgcGFP; pum<sup>680</sup>*, *pgcGFP; nosGAL4>bratRNAi*, and *pgcGFP; nosGAL4>d4EHPRNAi* ovarioles shows temporal loss of GFP regulation restricted to the 8- and 16-cell cyst stages in the absence of Brat and d4EHP. Scale bar: 10µm.



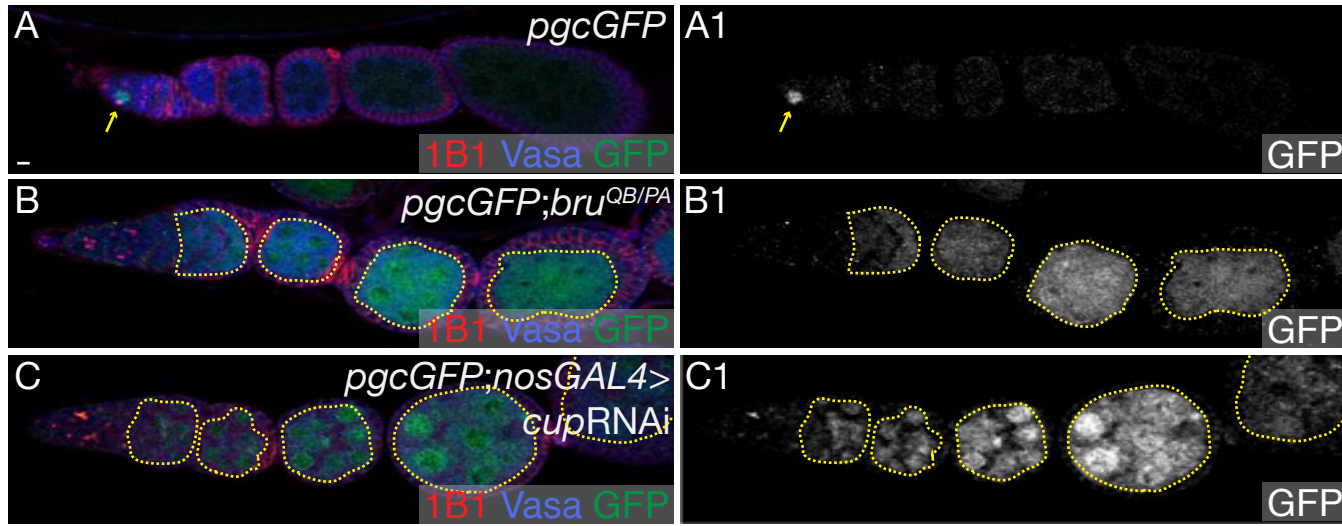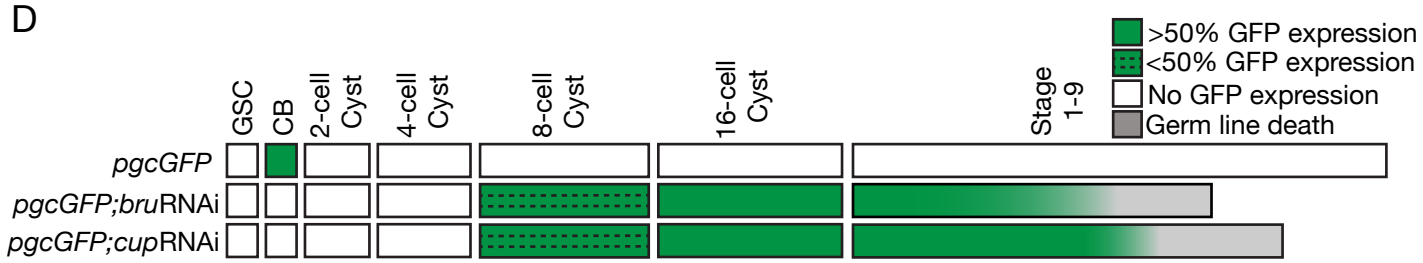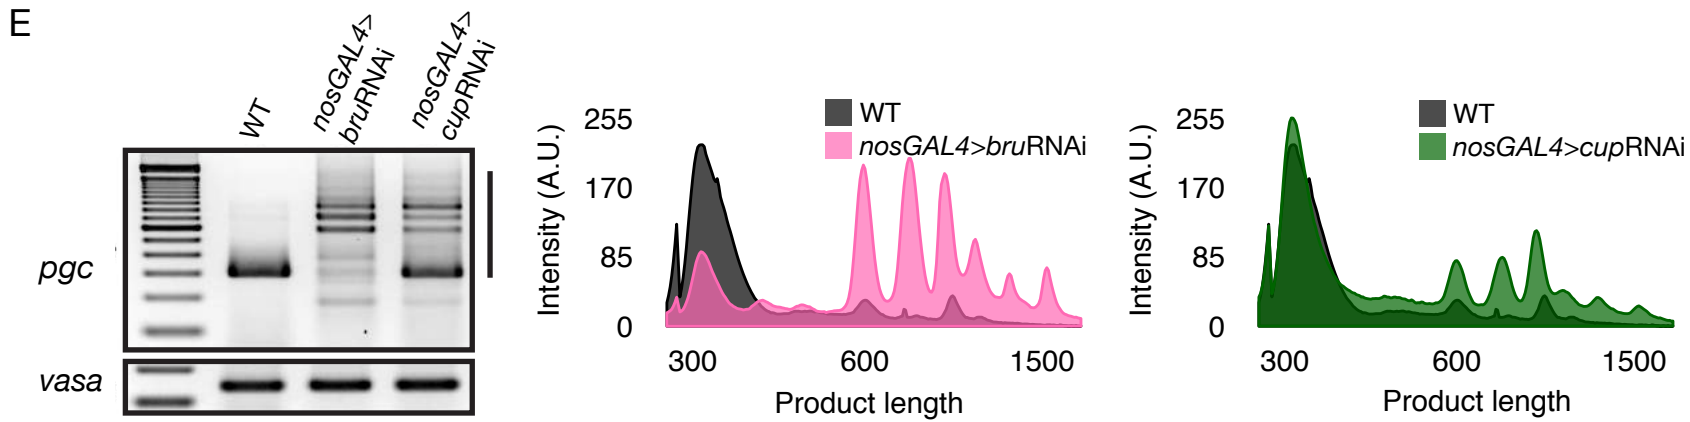

**Figure 6. Bru and Cup regulate Pgc translation in the later stages of oogenesis** (A, A1) The ovariole of a *pgcGFP* ovary stained with 1B1 (red), Vasa (blue) and GFP (green) shows expression of GFP only in the pre-CB. GFP channel shown in gray scale in A1. (B, B1) The ovariole of a *pgcGFP; bru<sup>QB/PA</sup>* mutant ovary stained with 1B1 (red), Vasa (blue) and GFP (green) shows aberrant expression of GFP in the entire ovariole beyond the 16-cell cyst stages (12% from 8-cell cyst onwards, 100% from 16-cell cyst onwards, n=25 ovarioles). GFP channel shown in gray scale in B1. (C, C1) The ovariole of an ovary with *cup* depleted from the germline by RNAi stained with 1B1 (red), Vasa (blue) and GFP (green) shows aberrant expression of GFP in the entire ovariole from the later cyst stages (20% from 8-cell cyst onwards, 100% from 16-cell cyst onwards, n=30 ovarioles). GFP channel shown in gray scale in C1. (D) A developmental profile of GFP expression in *pgcGFP*, *pgcGFP; nosGAL4>bruRNAi*, and *pgcGFP; nosGAL4>cupRNAi* ovarioles shows a temporal loss of GFP regulation throughout oogenesis from beyond the 16-cell cyst stage. (E) PAT assay analysis of *pgc* poly(A)-tail length in ovaries from wild-type, *pgcGFP; nosGAL4>bruRNAi*, and *pgcGFP; nosGAL4>cupRNAi* shows that loss of Bru and Cup in the germ line results in a significant change in the poly(A)-tail length of the *pgc* RNA. Scale bars: 10 $\mu$ m.

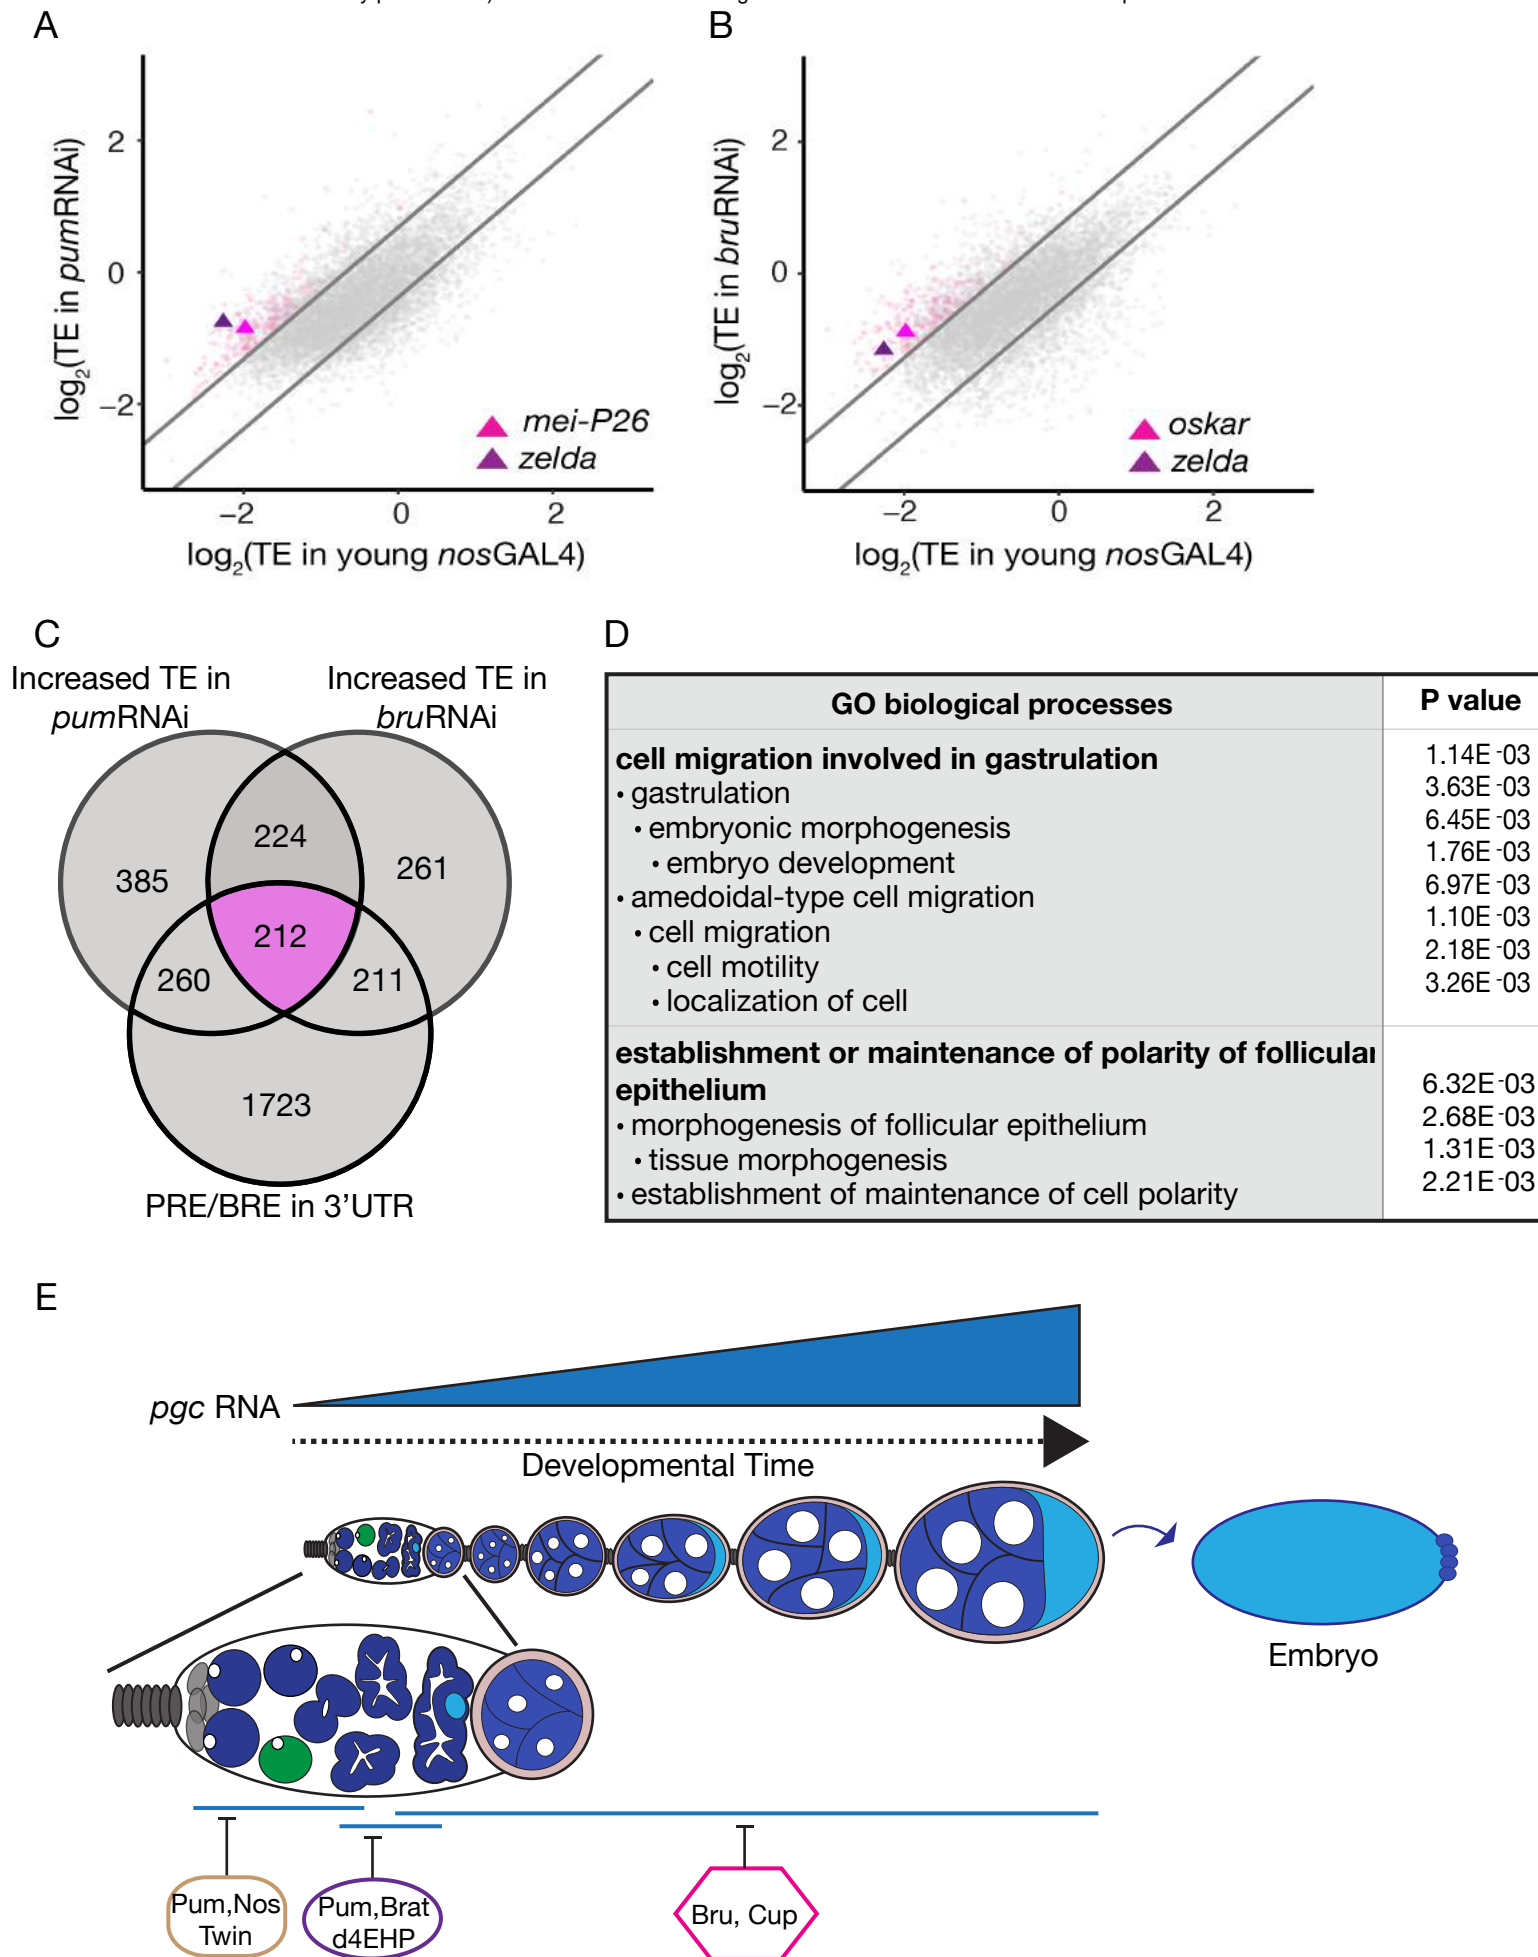

**Figure 7. A class of germline RNAs are similarly regulated by both Pum and Bru (A)**

A bi-plot representing the translational efficiencies (TEs) of expressed mRNAs in *nosGAL4>pumRNAi* vs young *nosGAL4* (wild-type) ovaries. The lines represent cut-offs, which are one standard deviation above and below the median ratio of TEs. Pink points represent targets containing a PRE/BRE sequence with higher TE in germline depletion of *pum* and *bru*. (B) A bi-plot representing the translational efficiencies (TEs) of expressed mRNAs in *nosGAL4>bruRNAi* vs young wild-type ovaries. The lines represent cut-offs which are one standard deviation above and below the median ratio of TEs. Pink points represent targets containing a PRE/BRE sequence with higher TE upon the germline depletion of *pum* and *bru*. (C) A Venn diagram showing the number of shared targets upon the germline depletion of *pum* and *bru*, which have a higher TE than control and mRNAs that contain an PRE/BRE in their 3'UTR (confusing, reverse the order, first the evidence then the conclusion). The area marked in pink corresponds to the pink points represented in the bi-plots. (D) A table representing the Gene Ontology analysis carried out on the targets of Pum and Bru-mediated regulation that contain a sequence similar to the PRE/BRE sequence identified in the *pgc* 3'UTR. (E) A model accounting for the sequential regulation of *pgc* RNA by various trans-acting factors that are themselves temporally restricted throughout different stages of oogenesis. Pum partners with Nos and Twin to regulate *pgc* in the GSCs to the 8-cell cyst stage. Pum then partners with Brat and d4EHP to regulate *pgc* from the 4- and 16-cell cyst stage. *pgc* is regulated by Bru and Cup from the 8-cell cyst and onwards.

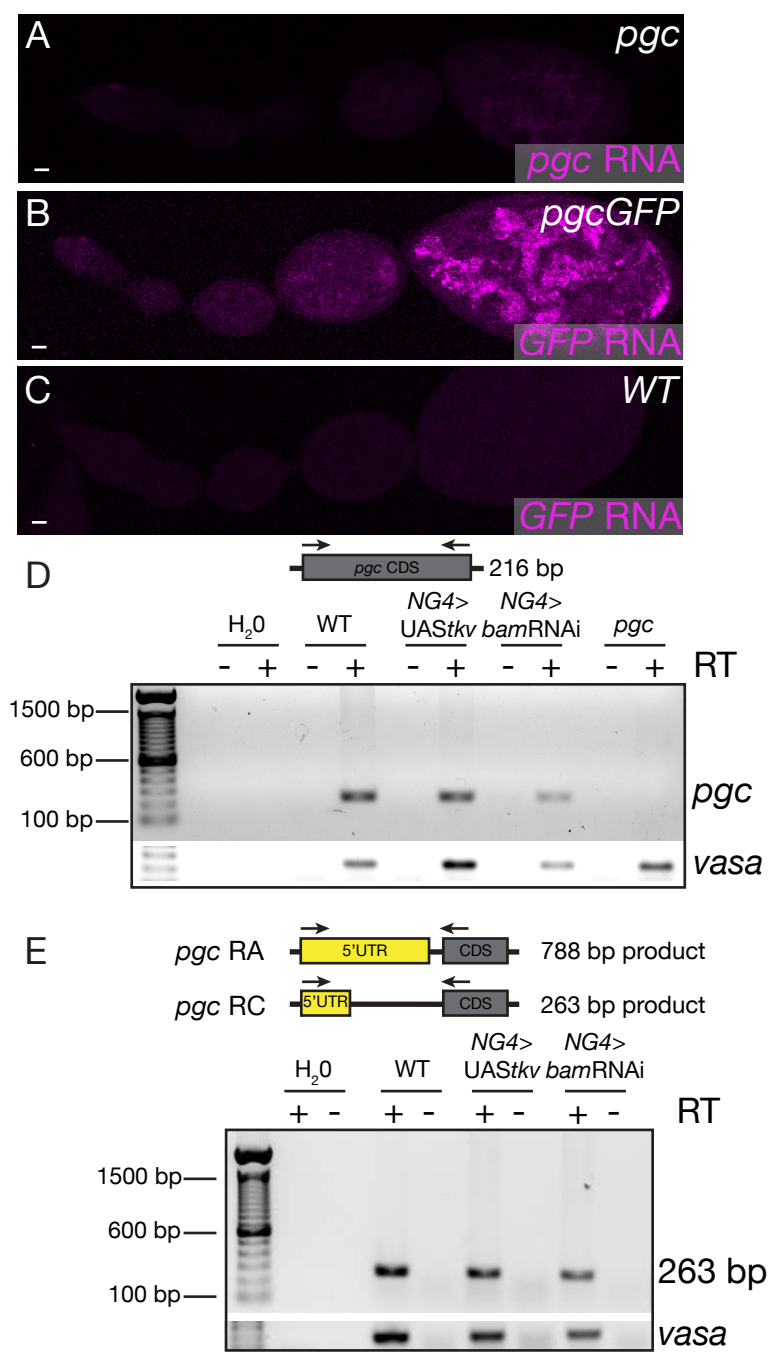

**Supplemental Figure 1. Pgc is translationally regulated via its UTRs** (A) The ovariole of a *pgc* mutant fly probed for *pgc* RNA (magenta) using FISH, show no signal for *pgc* RNA. (B) The ovariole of a *pgcGFP* transgenic fly probed for *GFP* RNA (magenta) using FISH, show similar expression pattern when compared to endogenous *pgc* RNA. (C) The ovariole of a wild-type fly probed for *GFP* RNA (magenta) using FISH, show no signal for *GFP* RNA. (D) RT-PCR of *pgc* CDS was carried out on RNA samples extracted from wild-type, *nosGAL4>UAStkv* and *nosGAL4>bamRNAi* show *pgc* RNA is not only present in whole adult ovaries, but also transcribed in GSC and CB enriched tumors. RNA null *pgc* mutant was used as a negative control. RT-PCR of *Vasa* was carried out as a positive control. (E) RT-PCR of *pgc* 5'UTR was carried out on RNA samples extracted from wild-type, *nosGAL4>UAStkv* and *nosGAL4>bamRNAi*. Primers were designed as to show either a 788bp or a 263bp product to confirm what 5'UTR length of *pgc* RNA was being expressed during oogenesis. Results showed presence of short version of *pgc* 5' UTR in whole adult ovaries, GSC and CB enriched tumors. RNA null *pgc* mutant was used as a negative control. RT-PCR of *Vasa* was carried out as a positive control. Scale bars: 10 $\mu$ m.



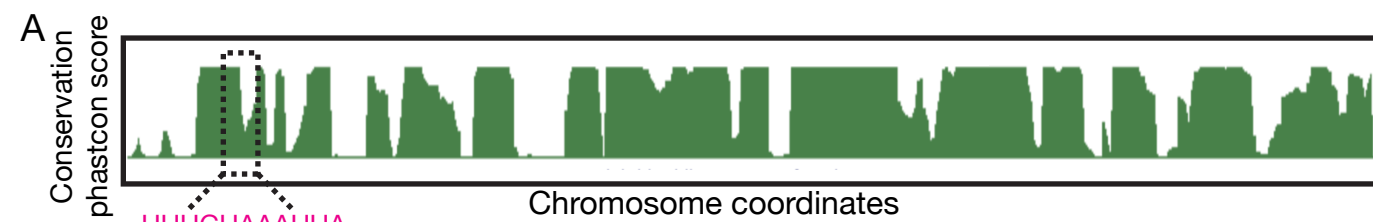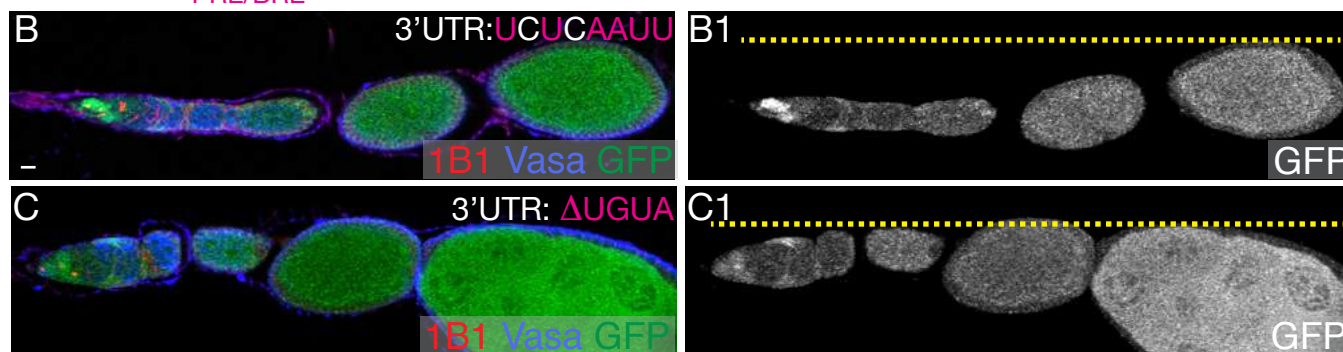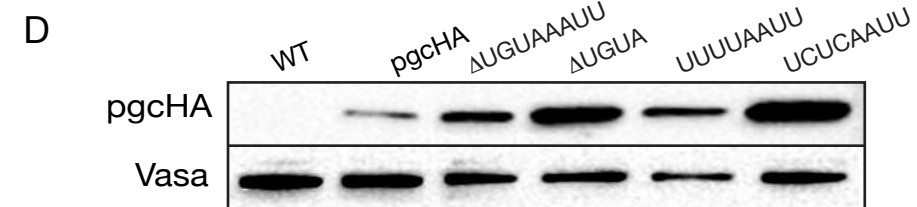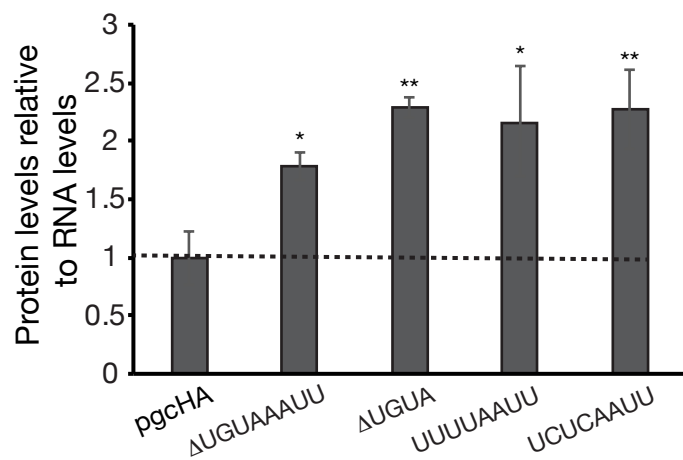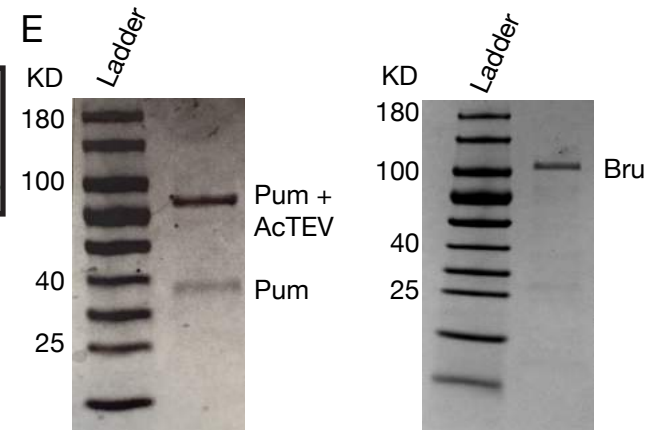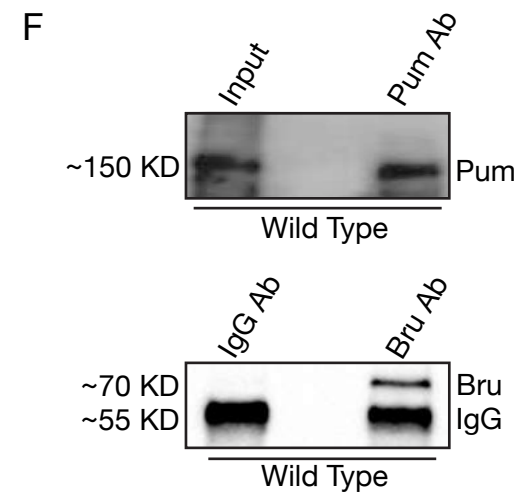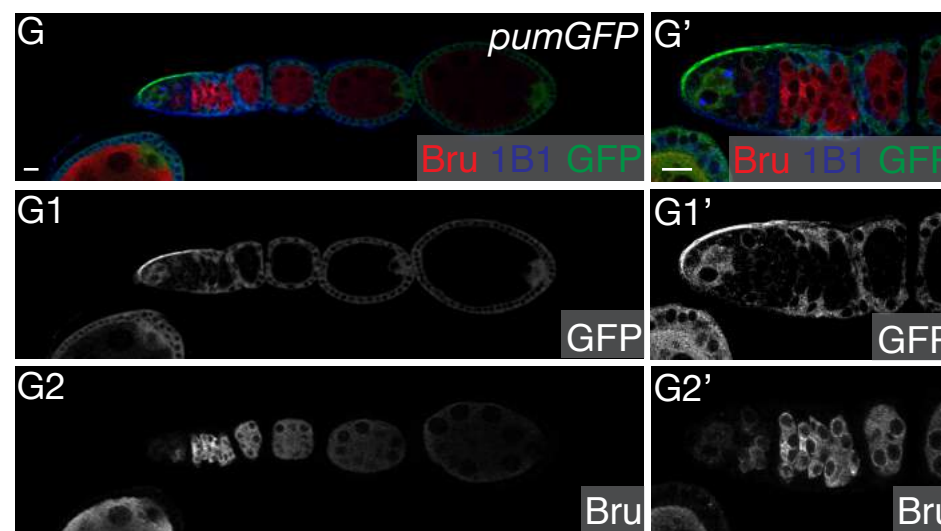

**Supplemental Figure 2. A cis-element in the *pgc* 3'UTR that binds both Pum and Bru is required for translational control throughout oogenesis**

(A) A phylogenetic analysis of *pgc* 3'UTR of all Drosophilids identified a conserved sequence that can potentially bind both RBPs, Pum and Bru. (B) The ovariole of a transgenic fly created by fusing GFP to *pgc* 5' and *pgc* 3'UTR where the UGUA sequence was mutated to UCUC (3'UTR: UCUCAUU) and driven under *pgc* promoter stained with 1B1 (red), Vasa (blue) and GFP (green) shows loss of GFP regulation throughout oogenesis. (C) Ovariole of a transgenic fly created by fusing GFP to *pgc* 5' and *pgc* 3'UTR where the UGUA sequence was deleted (3'UTR:  $\Delta$ UGUA) and driven under *pgc* promoter stained with 1B1 (red), Vasa (blue) and GFP (green) shows loss of GFP regulation throughout oogenesis. (D) Normalized protein expression to RNA levels shows that either deletions or mutations in the PRE/BRE sequence of the 3'UTR of *pgc* results in a significant upregulation of Pgc reporter protein when compared to FL 3'UTR. A student t-test statistical analysis was performed. \* indicates p-value <0.05 and \*\* indicates p-value <0.005. (E) Commasie stained SDS-PAGE gel showing successful purification of recombinant Pum and full length Bru protein. (F) Western Blot shows successful pull-down of Pum and Bru from wild-type ovary lysates using anti-Pum and anti-Bru antibody, respectively. (G-G2') *pumGFP* transgene fly stained with Bru (red), 1B1 (blue) and GFP (green) shows that Pum protein is expressed in high levels in the earliest stages of oogenesis and lowers in later differentiating stages while Bru protein levels are low in early stages and increases from the 8-cell cyst stages and onwards. G1 and G2 shows GFP and Bru channels in gray. Scale bars: 10 $\mu$ m.

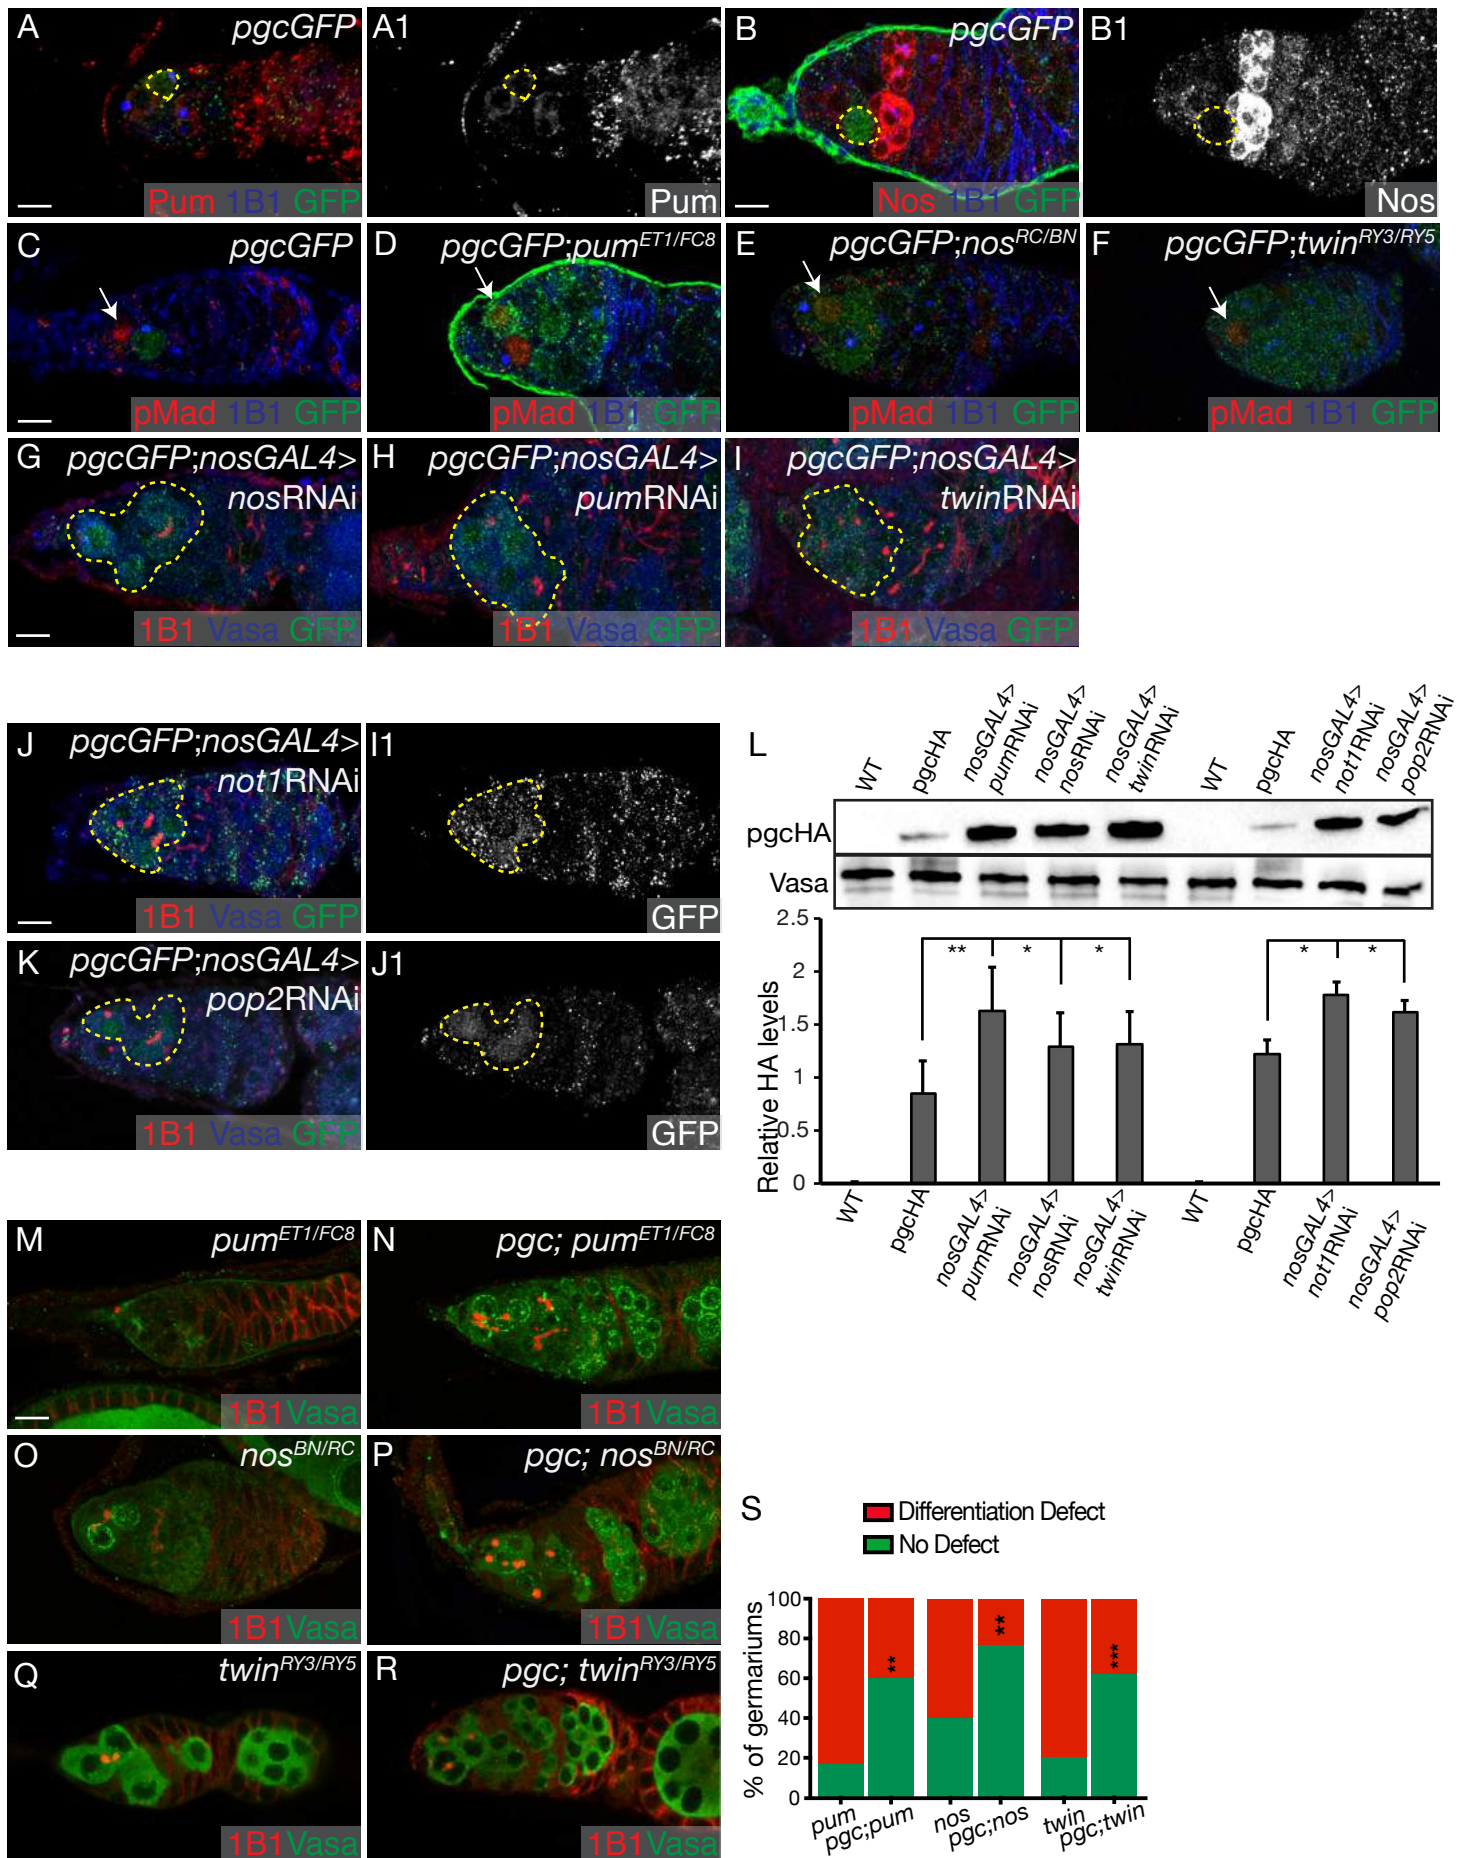

### Supplemental Figure 3. Pum and its co-factor Nos regulate Pgc translation in the GSCs

(A, A1) The germarium of *pgcGFP* fly stained with Pum (red), 1B1 (blue) and GFP (green) shows high levels of Pum protein in the GSC, 2- to 4-cell cysts. Pum staining is shown in gray in A1. (B, B1) The germarium of *pgcGFP* fly stained with Nos (red), 1B1 (blue) and GFP (green) shows Nos protein is present throughout the germarium except for the GFP expressing pre-CB cell. Nos staining is shown in gray in B1. (C) The germarium of *pgcGFP* fly stained with pMad (red), 1B1 (blue) and GFP (green) show GSCs do not express GFP. (D-F) The germaria of *pgcGFP*, *pgcGFP; pum<sup>ET1/FC8</sup>*, *pgcGFP; nos<sup>RC/BN</sup>* and *pgcGFP; twin<sup>ry3/ry5</sup>* stained with pMad (red), 1B1 (blue) and GFP (green) show that in absence of Pum and its co-factors, there is a loss of GFP regulation in the GSCs. (G-I) The germaria of *pgcGFP; nosGAL4>nosRNAi*, *pgcGFP; nosGAL4>pumRNAi* and *pgcGFP; nosGAL4>twinRNAi* flies stained with 1B1 (red), Vasa (blue) and GFP (green) show aberrant expression of GFP in the earliest stages of oogenesis, including the GSCs. (J, J1) The germarium of germline depletion of *not1* ovary stained with 1B1 (red), Vasa (blue) and GFP (green) shows aberrant expression of GFP in the GSCs and 4-cell cysts (100%, n= 25 germaria). GFP channel showed in gray scale in J1. (K, K1) The germarium of germline depletion of *pop2* ovary stained with 1B1 (red), Vasa (blue) and GFP (green) shows aberrant expression of GFP in the GSCs to the 4-cell cyst stages (100%, n= 25 germaria). GFP channel showed in gray scale in K1. (L) A western blot analysis shows a significant upregulation of Pgc reporter protein in the germline depletion of *pum*, *nos*, *twin*, *not1*, and *pop2* ovaries when compared to *pgcGFP*. A student t-test statistical analysis was performed. \* indicates p-value <0.05 and \*\* indicates p-value <0.005. (M, O, Q) The germaria of *pum<sup>ET1/FC8</sup>*, *nos<sup>RC/BN</sup>* and *twin<sup>RY3/R5</sup>* mutants stained with 1B1 (red) and Vasa (green) show germline defects that include proper development of differentiating cysts. (N, P, R) The germaria of *pgc; pum<sup>ET1/FC8</sup>*, *pgc; nos<sup>RC/BN</sup>* and *pgc; twin<sup>ry3/ry5</sup>* double mutants stained with 1B1 (red) and Vasa (green) show rescue of the germline, with proper development of differentiating cysts that eventually make egg chambers. (S) Quantification of rescue experiment shows a significant decrease of differentiation defects in double mutants of *pgc; pum<sup>ET1/FC8</sup>*, *pgc; nos<sup>RC/BN</sup>* and *pgc; twin<sup>ry3/ry5</sup>* when compared to *pum*, *nos* and *twin* mutants. Scale bars: 10µm.

A

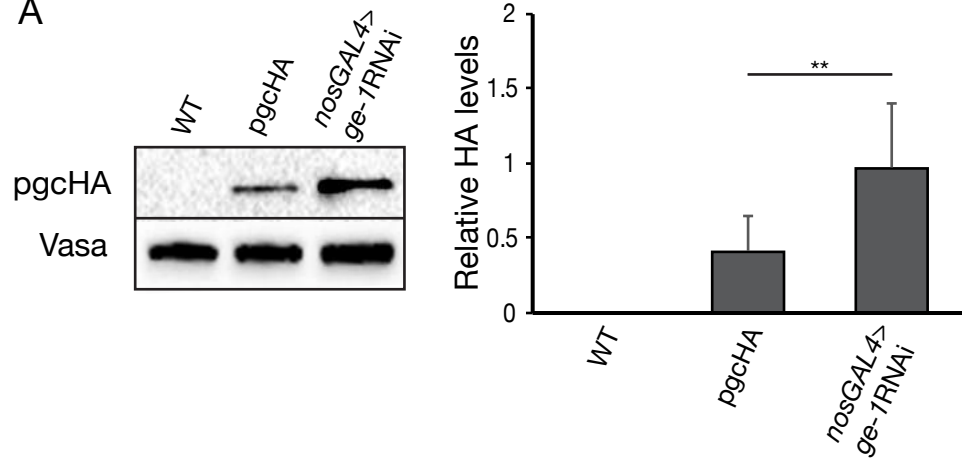



**Supplemental Figure 4. Me31B cooperates with the decapping protein dGe-1 and *pgc* 5'UTR to mediate repression in the GSCs and early differentiating cysts (A)** A western blot analysis shows a significant upregulation of Pgc reporter protein in the germline depletion of *dge-1* ovaries when compared to *pgcGFP*. A student t-test statistical analysis was performed. \* indicates p-value <0.05 and \*\* indicates p-value <0.005. We were unsuccessful in isolating stable lysates from Me31B depleted ovaries to carry out a WB analysis.



A

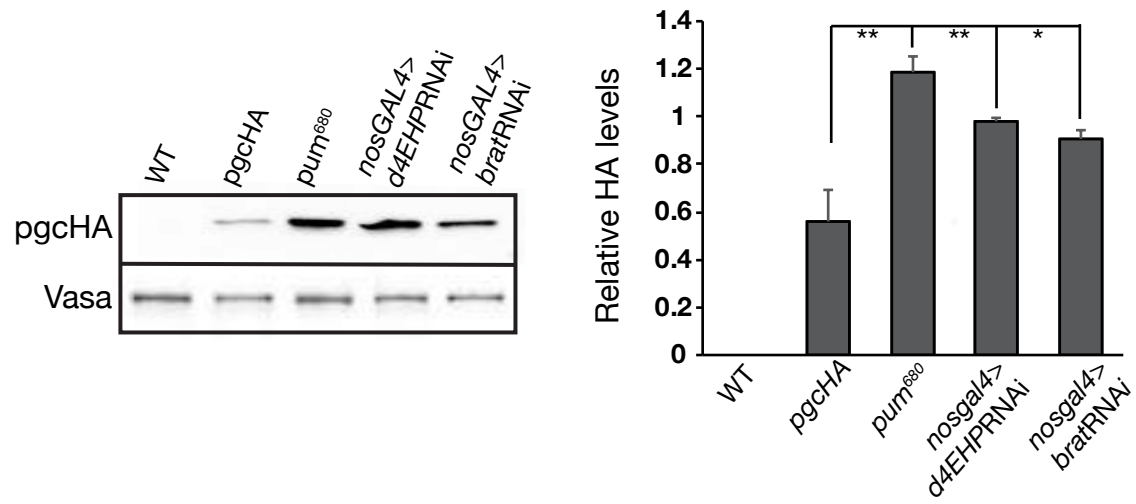

B

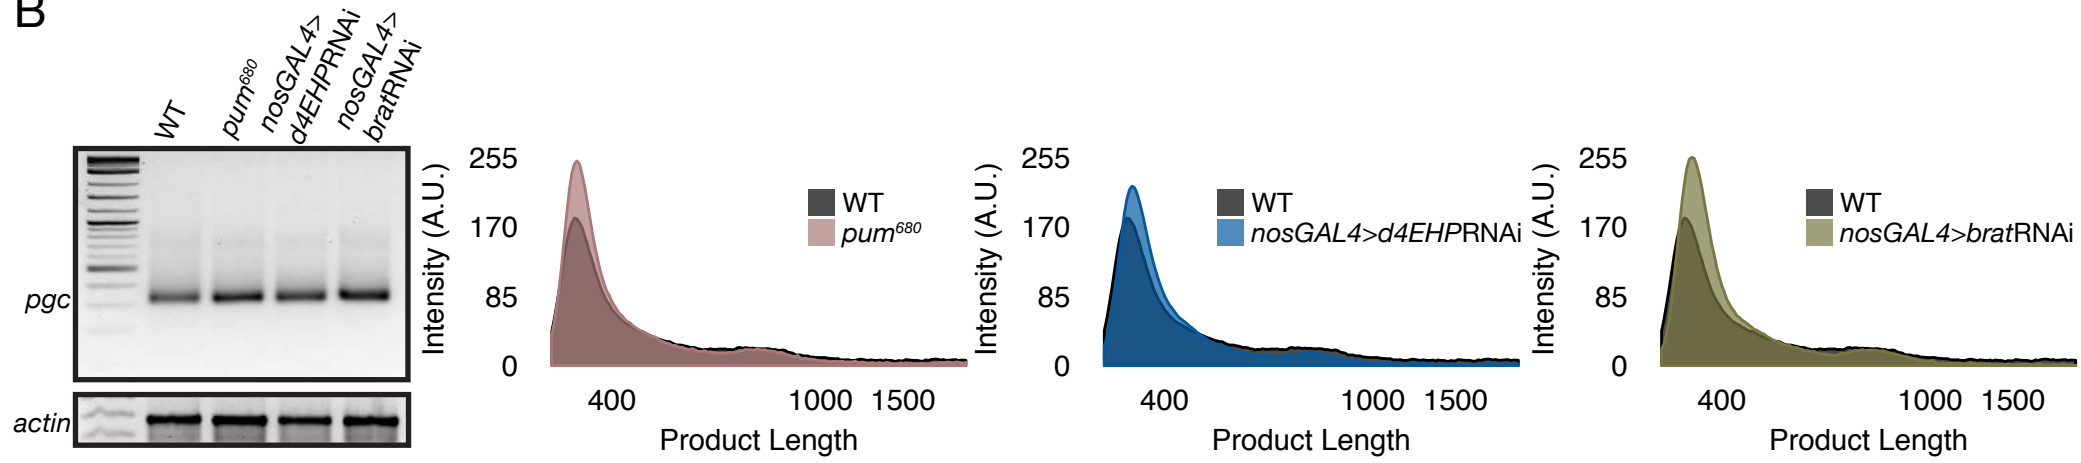

**Supplemental Figure 5. Pum and its co-factor Brat regulate Pgc translation in the 4- to 16-cell cysts** (A) A western blot analysis shows a significant upregulation of Pgc reporter protein in *pum*<sup>680</sup> and the germline depletion of *brat* and *d4EHP* ovaries when compared to *pgcGFP*. A student t-test statistical analysis was performed. \*\* indicates p-value <0.005. (B) PAT assay analysis of *pgc* poly(A)-tail length in wild-type, *pum*<sup>680</sup> and germline depletions of d4EHP and Brat show that loss of these factors do not result in any change of poly(A)-tail length of *pgc*.

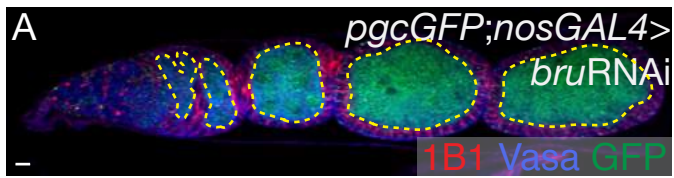

**B**

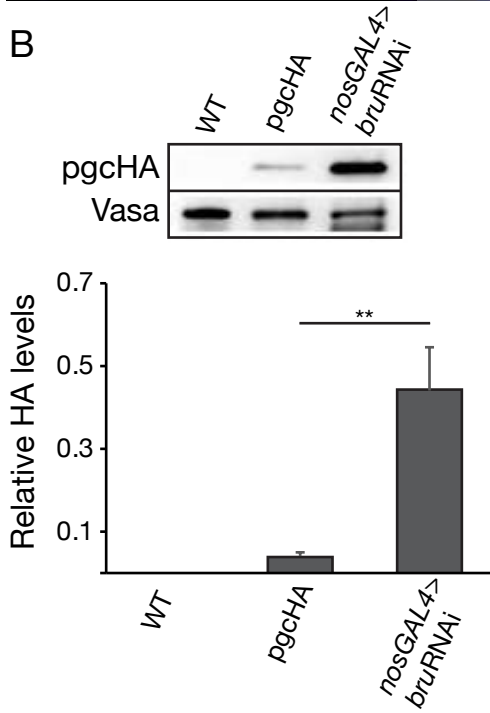

**Supplemental Figure 6. Bru and Cup regulate Pgc translation in the later stages of oogenesis** (A) The ovariole of *pgcGFP; nosGAL4>bruRNAi* stained with 1B1 (red), Vasa (blue) and GFP (green) shows upregulation of reporter expression from 16-cell cyst onwards. (B) A western blot analysis shows a significant upregulation of Pgc reporter protein in the germline depletion of Bru ovaries when compared to *pgcGFP*. We were unsuccessful in isolating stable lysates from Cup depleted ovaries to carry out a WB analysis. A student t-test statistical analysis was performed. \*\* indicates p-value <0.005. Scale bars: 10µm.

A

Young *nos*GAL4

Cyclohexamide treatment

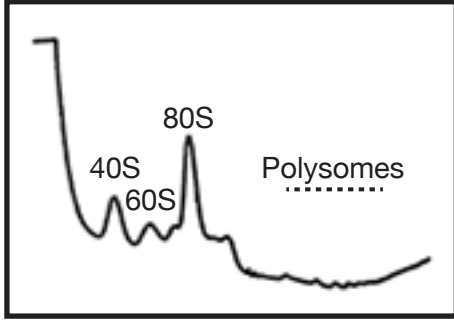

*pum*RNAi

Cyclohexamide treatment

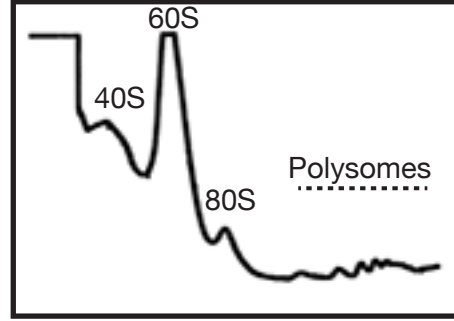

*bru*RNAi

Cyclohexamide treatment

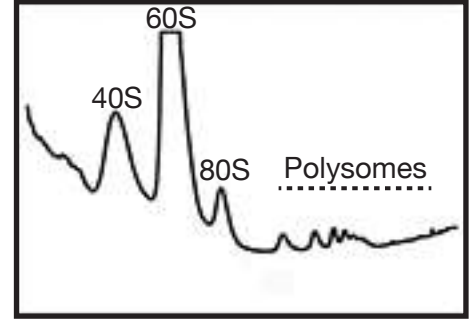

B

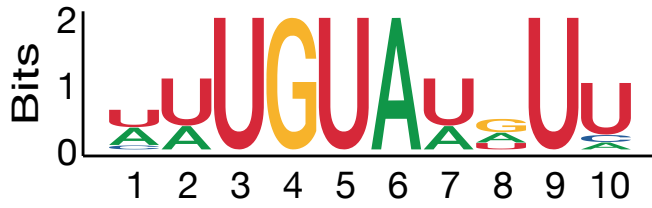

C

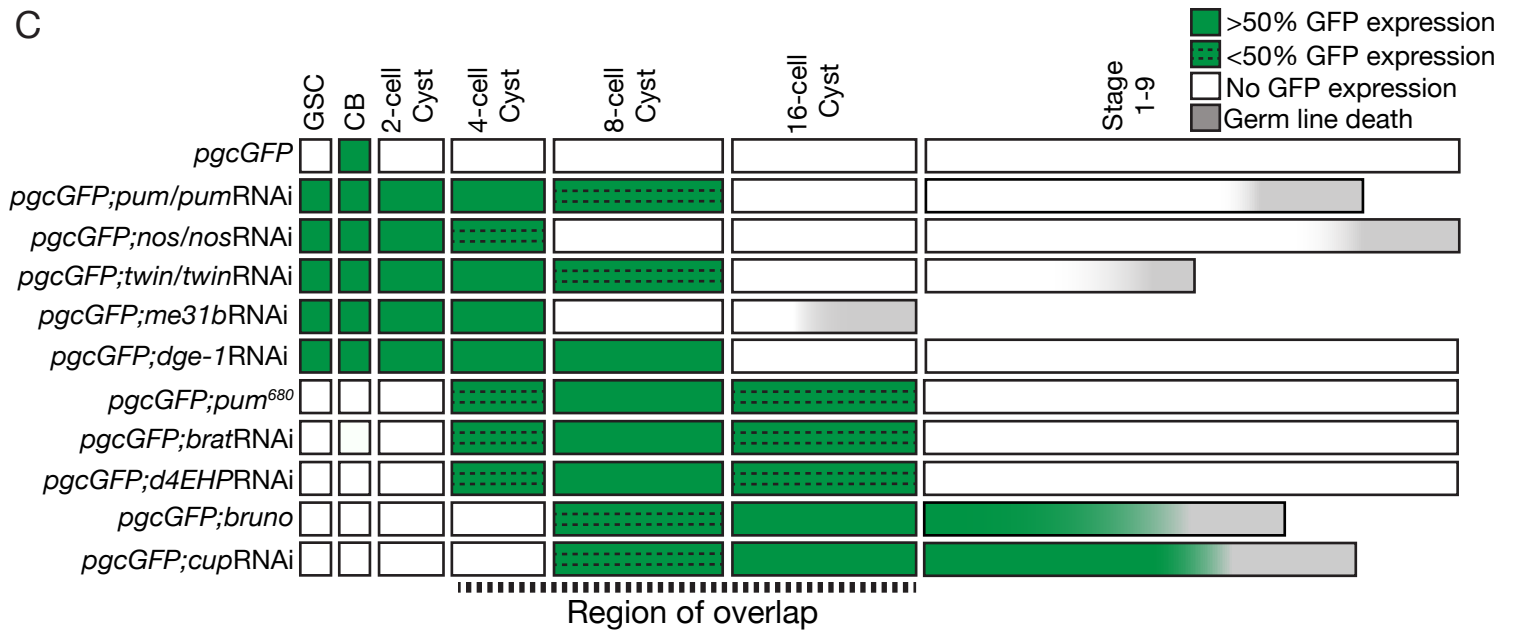

**Supplemental Figure 7. A class of germline RNAs are similarly regulated by both Pum and Bru** (A) Polysome profile traces of young *nosGAL4*, *pgcGFP*; *nosGAL4>pumRNAi*, and *pgcGFP*; *nosGAL4>bruRNAi* ovaries treated with cyclohexamide. (B) The logo of the sequences used to identify shared targets of Pum and Bru mediated regulation that contain a sequence similar to the PRE/BRE sequence identified in the *pgc* 3'UTR. (C) A developmental profile of GFP expression in *pgcGFP*, *pgcGFP*; *pum<sup>ET1/FC8</sup>/pumRNAi*, *pgcGFP*; *nos<sup>RC/BN</sup>/nosRNAi*, *pgcGFP*; *twin<sup>ry3/ry5</sup>/twinRNAi*, *pgcGFP*; *me31BRNAi*, *pgcGFP*; *dge-1RNAi*, *pgcGFP*; *pum<sup>680</sup>*, *pgcGFP*; *nosGAL4>bratRNAi*, *pgcGFP*; *nosGAL4>d4EHPRNAi*, *pgcGFP*; *nosGAL4>bruRNAi*, and *pgcGFP*; *nosGAL4>cupRNAi* ovarioles show temporal and sequential loss of GFP regulation in different stages of oogenesis where these trans-acting factors mediate *pgc* regulation.



## Materials and Methods

### Fly stocks

*Drosophila* was grown on corn flour and agar media with brewer's yeast. All strains were grown at 25°C, except RNAi crosses, which were grown at 29°C. *pgcGFP* and *pgc<sup>Δ</sup>* used in this study have been previously reported (Martinho et al. 2004; Flora et al. 2018). *lipriny<sup>H1</sup>* flies were a gift from the Triesman Lab (Astigarraga et al. 2010). *nos* mutants were generated by crossing the *nos<sup>RC</sup>* and *nos<sup>BN</sup>* alleles (Arrizabalaga and Lehmann 1999). *pum* mutants were created by crossing the *pum<sup>FC8</sup>* and *pum<sup>ET1</sup>* alleles (Forbes and Lehmann 1998). *twin* mutants were created by crossing the *twin<sup>ry3</sup>* and *twin<sup>ry5</sup>* (Morris 2005). The *pum<sup>680</sup>* allele is described in Wharton et al., 1998. *nos-GAL4::VP16* was gifted by the Lehmann lab. *w<sup>1118</sup>*, *nosRNAi* (33973, 57700), *pumRNAi* (26725, 38241), *twinRNAi* (32490), *bratRNAi* (28590 and 34646), *d4EHPRNAi* (36876), *not1RNAi* (32836), *pop2RNAi* (30492), *Me31BRNAi* (28566), *ge-1RNAi* (32349), *bruRNAi* (38983) and *cupRNAi* (35406) lines were acquired from the Bloomington Drosophila Stock Center, Bloomington, IN.

### Transgenic lines

The P-P-P (*pgc* promoter-*pgc* 5'UTR-eGFP-*pgc* 3'UTR) construct was generated by cloning eGFP coding sequence into a plasmid with the *pgc* 5'UTR and *pgc* 3'UTR as previously described (Flora et al. 2018). The P-P-T (*pgc* promoter-*pgc* 5'UTR-eGFP-*tubulin* 3'UTR) and P-P-K (*pgc* promoter-*pgc* 5'UTR-eGFP-*K10* 3'UTR) constructs were assembled by PCR amplifying a XhoI-KpnI fragment containing the *α-tubulin* 3'UTR (T) or *K10* 3'UTR (K) was then cloned into the XhoI-KpnI site of the P-P-P plasmid, respectively. In order to allow for interchanging of the 700 bp *pgc* promoter and *pgc* 5'UTR region of P-P-K, Agel site was created between of those regions of P-P-K via Genscript by Fisher Scientific. The P-N-K (*pgc* promoter-*nos* 5'UTR-eGFP-*K10* 3'UTR) construct was then generated by inserting the *nos* 5'UTR with Agel and SpeI overhangs into the Agel-SpeI site of the P-P-K plasmid. A 700 bp fragment of the *nos* promoter was cloned upstream of the *pgc* 5'UTR of the P-P-K construct at the NotI and Agel sites to yield N-P-K (*nos* promoter-*pgc* 5'UTR-eGFP-*K10* 3'UTR) construct. The *pgc* 3'UTR fragment was

cloned downstream of eGFP at the XhoI-KpnI site of P-N-K to generate P-N-P (*pgc* promoter-*nos* 5'UTR-eGFP-*pgc*3'UTR). The changes to the 3'UTR transgenes in (Fig. 2 and Supplemental Fig. S2) was created by site-directed mutagenesis using Phusion High-Fidelity DNA Polymerase (NEB, Cat # M0530S). The primers used are listed separately.

### **Immunostaining**

Female *Drosophila* ovaries were dissected in 1X PBS and fixed in 4% paraformaldehyde for 30 minutes. 1 ml of permeabilization solution, PBST (1X PBS, 0.2% Tween and 1% Triton-X), was added to the tissue. After permeabilization the tissues were blocked in 1 ml of BBT (0.5% BSA in PBST). Then 0.5 ml of primary antibody was added and tissues were incubated at 4°C overnight on a nutator. Concentration used for each antibody has been detailed below. After overnight incubation, ovaries were washed three times in 1 ml of BBT for 10, 15, 30 minutes. An additional wash for 30 minutes was carried on by adding 2% Donkey serum to 1 ml of BBT. After the last wash secondary antibody in 0.5 ml of BBT with 4% Donkey serum was added and incubated for 2 hours protected from light. Secondary antibodies used in this study have also been listed below. After the 2-hour incubation, ovaries were washed in 1 ml of PBST for five times. After the washed, one-drop of Vectashield (Vector Labs, Inc.) was added and then the tissue was mounted on a glass slide and a coverslip was placed on the slide. Antibodies used in this study, rabbit anti-Vasa (1:4000 dilution) and chicken anti-Vasa (1:500 dilution) was generated in our lab. mouse anti-1B1 (1:20) is from DSHB, Iowa city, IA. Rabbit anti-GFP (ab6556) (1:2000) and rabbit anti-pSmad3 (ab52903) (1:150) were acquired from abcam, Cambridge MA. Rabbit anti-Nanos (1:500) antibody was a gift from the Buszczak lab. Rabbit anti-Bruno (1:500) and rabbit anti-Pumilio (1:500) antibodies were a gift from the Lehmann lab. Alexa 488 (Molecular Probes), Cy3 and Cy5 (Jackson Labs) conjugated secondary antibodies were used at a concentration of 1:500.

### **Fluorescent *in situ* hybridization (FISH)**

FISH of the ovaries was carried out probes against *pgc* and *GFP*, which were a gift from the Lehmann lab (Trcek et al. 2017). The ovaries were dissected in 1XPBS, fixed in 3% formaldehyde in PBS for 20 minutes and washed 3 times with PBST. Next, they were

treated with 3 ug/ml Proteinase K in PBS and placed on a nutator for 13 minutes at RT, and then placed on ice for 30 minutes. The tissue was then blocked in 2 mg/ml glycine in PBST twice for 10 minutes each and rinsed twice with PBST for 2 minutes. The ovaries were post-fixed for 20 minutes in 3%. The tissue was then washed with PBST 5 times for 2 minutes and washed with pre-warmed fresh pre-hybridization mix (10% deionized formamide in 2X SSC) for 10 minutes. 60  $\mu$ l per sample of hybridization mix (10% deionized formamide, 0.5  $\mu$ l of yeast t-RNA, 0.5  $\mu$ l of salmon sperm DNA, 1  $\mu$ M of probe, 10% Dextran sulphate, 2 mg/ml BSA, 2X SSC and 1  $\mu$ l of RNase Out) was added and the sample was incubated overnight at 37°C for at least 12 hours and no more than 16 hours. After incubation, 1 ml of pre-warmed pre-hybridization solution was added to the tissues. After 10 minutes, the pre-hybridization solution was removed, and the ovaries were washed 5 times with 1XPBS for 15 minutes each. After the last wash, PBS was aspirated out and a drop of Vectashield (Vector Labs, Inc.) was added to the tissue before preparing the slide.

## **Imaging**

All images were taken on a Carl Zeiss 710 Meta confocal microscope using 20X or 40X oil immersion objectives. Scale bars were added using Zen Blue image processing software.

## **Western Blot**

Twenty wild-type size ovaries or 40 mutant size ovaries were dissected in 1XPBS. After dissection, all the PBS was aspirated and 30  $\mu$ l of NP-40 buffer with protease inhibitors added to the tissue and homogenized. The lysate was centrifuged at 13,000 rpm for 15 minutes at 4°C. The middle layer was transferred into a new tube. 1  $\mu$ l of the protein extract was used to carry out a Bradford (Bio-Rad, Cat. #500-0205) assay. 25  $\mu$ g of protein was denatured with 4X Laemmli Sample Buffer (Bio-Rad, Cat. #161-0747) and  $\beta$ -mercapethanol at 95°C for 5 minutes. The samples were loaded in a Mini-PROTEAN TGX 4-20% gradient SDS-PAGE gels (Bio-Rad, Cat. #456-1094) and run at 110V for 1 hour. The proteins were then transferred to a 0.20  $\mu$ m nitrocellulose membrane at 100V for 1 hour at 4°C. After transfer, the membrane was blocked in 5% milk in PBST for 2 hours at

RT. Primary antibody rat anti-HA (Roche Diagnostics, REF 11867423001) (1:3000) prepared in 5% milk in PBST was added to the membrane and incubated at 4°C O/N. The membrane was then rinsed in 0.5% milk in PBST 4-5 times. anti-rat HRP (1:10,000) was prepared in 5% milk in PBST, and was added to the membrane and incubated at RT for 2 hours. The membrane was then rinsed in PBST 4-5 times. Bio-rad chemiluminescence ECL kit was used to image the membrane. The membrane was then stripped using 25 ml of stripping buffer and re-probed for Rb Vasa (1:6000) as a loading control. anti-rabbit HRP was used at 1:10,000 dilution. For Western Blot analysis *pgcHA* levels were normalized to Vasa levels of each genotype. Then the fold change was calculated for each genotype by subtracting fold change of wild-type control from all experimental samples.

### **RNA Extraction**

Wild-type ovaries were dissected in 1XPBS. After dissection, all the PBS was aspirated and 100 µl of Trizol reagent was added to the tissue. The tissue was homogenized. 900 µl of Trizol was added, mixed and incubated at RT for 3 minutes. After incubation, 200 µl of Chloroform was added to each sample and mixed vigorously and incubated at RT for 5 minutes. The samples were then centrifuged at 13,000 rpm for 20 minutes at 4°C. The aqueous layer was then transferred to a new centrifuge tube. 2 volumes of 100% ethanol, 10% volume 3 M sodium acetate and 0.5 ul of glycol blue was added to the samples and incubated at -20°C for 1 hour. The samples were then centrifuged at 13,000 rpm for 20 minutes at 4°C. The pellet was then washed with 75% ethanol, air-dried and re-suspended in RNase free H<sub>2</sub>O. For efficient re-suspension of the isolated nucleic acid, the sample was incubated at 50°C for 10 minutes. The concentration of the isolated RNA was determined using a Nanodrop. 10µg of nucleic acid was then taken and subjected to a DNase treatment using the TURBO DNA-free Kit by Life Technologies (AM1907).

### **Immuno-precipitation (IP)**

Each IP experiment was carried out in 100 pairs of wild-type ovaries. Ovaries were dissected in 1XPBS. After dissection, PBS was aspirated and 100 µl of RIPA buffer was added to the tissues and homogenized. Another 200 µl of IP lysis buffer (50 mM Tris pH

8.0, 1% Triton X-100, 0.1% sodium deoxycholate, 0.1% SDS, 140 mM NaCl, 1mM EDTA, 1 mM PMSF, 1 protease inhibitor pill) was added to the lysate and mixed well. The lysate was then centrifuged at 13,000 rpm for 20 minutes at 4°C. The supernatant was transferred to a new tube. 100 µl of homogenate from each sample was transferred to fresh centrifuge tubes. The following antibodies were added to the lysate and incubated at 4°C for 3 hours; 2.5 µl of rabbit anti-GFP (listed above), 1.25 µl of ChromePure Rabbit IgG (Jackson ImmunoResearch Labs), 2 µl of rabbit anti-Bru (gift from Dr. Lilly) or 2 µl of rabbit anti-Pum (gift from Lehmann lab). 100 µl of Dynabeads Protein A (Thermo Fisher Scientific) was rinsed three times with 400 µl of 1:10 dilution of protease inhibitor containing NP-40 buffer. After washing, the beads were re-suspended in 100 µl of NP-40 buffer containing protease inhibitors. 25 µl of these beads were added to each GFP and IgG containing lysate samples and incubated overnight at 4°C. After incubation, the beads were washed four times with 1:10 dilution of protease inhibitor containing NP-40 buffer for 1 minute. An additional two washes for 5 minutes were carried out before re-suspending the beads in 20 µl of NP-40 buffer. 10 µl of beads from each of the samples were used to perform a Western Blot analysis to confirm pull-down. The other 10 µl was used to extract RNA to perform qRT-PCR or RT-PCR experiments to show association of RNA with pulled-down protein.

### **Protein Purification**

Pumilio expression plasmid pFN18K Pum RNA-binding domain (aa 1091-1426) was gifted to us by the Goldstrohm lab. Pumilio was purified following the protocol described in Weidmann et.al, 2016. Bruno expression plasmid pETM-82 was acquired from EMBL (Chekulaeva et al. 2006). 5 ml of Bruno in pETM-82 in BL21(DE3) was grown overnight at 37°C. This culture was added to 1000 ml of LB-Kanamycin media. Cells were shaken at 220 rpm at 37°C for 2-3 hr or until OD600~0.8. The culture was then cooled down to 25°C. 0.5 mM IPTG was added to induce the cells and shaken at 220 rpm at 25°C for 3 hours. The cells were then centrifuged at 4000xg for 20 minutes at 4°C in 50 ml aliquots. The pellet was re-suspended in 3 ml of re-suspension buffer (20 mM Na phosphate, 50 mM NaCl, 20 mM imidazole, 10 ul of 500 mg/ml pH 7.4) and sonicated at 20% intensity for 20 seconds for 3 times and pulsed for 20 seconds for 3 times using 1/8 probe, making

sure the cell suspension is on ice throughout sonication. The suspension was then centrifuged at 10,000xg for 10 minutes for 4°C. Meanwhile, the column (His GraviTrap, GE Cat#11-0033-99) was equilibrated with 10 mL binding buffer (20 mM Na phosphate, 50 mM NaCl, 20 mM imidazole, 10 ul of 500 mg/ml pH 7.4). The supernatant was added to the column and washed with increments of 1 ml, 4 ml and 5 ml of binding buffer. The protein was then eluted using the following washes; twice with 1 ml of elution buffer (1), twice with 1 ml of elution buffer (2) and three times with 1 ml of elution buffer (3).

Elution Buffer (1): 20 mM NaPO<sub>4</sub>, 50 mM NaCl, 150 mM imidazole, pH 7.4

Elution Buffer (2): 20 mM NaPO<sub>4</sub>, 50 mM NaCl, 300 mM imidazole, pH 7.4

Elution Buffer (3): 20 mM NaPO<sub>4</sub>, 50 mM NaCl, 500 mM imidazole, pH 7.4

The last two fractions contained purified Bruno protein. 100% glycerol was added to the eluted protein for a final glycerol concentration of 20%. The eluted protein sample was de-salted using the PD-10 column (GE #17-0851-01).

### **Electrophoretic mobility shift assays (EMSA)**

RNA oligonucleotides were end-labeled using T4 Kinase (NEB) with ATP [ $\gamma$ -<sup>32</sup>P]. Excess ATP was eliminated by using G-25 Sephadix Columns (Roche, Cat # 11273990001). All RNA-binding reaction was performed in 1X Binding Buffer (50mM Tris pH 7.5, 150mM NaCl, 2mM DTT, 0.1mg/ $\mu$ l BSA, 0.001% Tween-20, 0.5 $\mu$ l of dIdC, 1 $\mu$ l RNaseOUT and 0.5 $\mu$ l of yeast t-RNA) (Weidmann et al. 2016). RNA and purified protein was incubated for 20 minutes at RT and then ran on an 8% native polyacrylamide TBE gel at 150V for 4 hours at 4°C. The gel was then dried onto Whatmann filter paper and exposed to a phosphor screen overnight. A Typhoon Trio imager was used to image the EMSAs.

### **Real Time-PCR (RT-PCR) and quantitative Real Time-PCR (qRT-PCR)**

500ng of DNase treated RNA was reverse transcribed using Super Script III (Life Technologies, Catalog Number: 1808051). For RT-PCR experiments, 1-2  $\mu$ l of cDNA was amplified using 0.5  $\mu$ l of 10  $\mu$ M of each reverse and forward primers, 0.5 $\mu$ l of 10 $\mu$ M (d)NTP and 0.125  $\mu$ l Taq Polymerase and 2.5  $\mu$ l 10XTaq Polymerase Buffer. The thermal cycling conditions for PCR was 95°C for 30 seconds, 32 cycles of 95°C for 30 seconds, 3°below the T<sub>m</sub> of the lowest T<sub>m</sub> primer for 30 seconds, 68°C for 1 minute, and 1 cycle of 68°C for



4 minutes. After PCR, 2.8  $\mu$ l of Orange-G dye was added to each sample and 10  $\mu$ l of PCR product was run on a 1% agarose gel stained with ethidium bromide to visualize bands.

For qRT-PCR experiments, 0.5  $\mu$ l of cDNA was amplified using 5 $\mu$ l of SYBR green Master Mix, 0.3  $\mu$ l of 10 $\mu$ M of each reverse and forward primers. The thermal cycling conditions consisted of 50°C for 2 minutes, 95°C for 10 minutes, 40 cycles at 95°C for 15 seconds, and 60°C for 60 seconds. The experiments were carried out in technical triplicate and three biological replicates for each data point. To calculate fold change in mRNA levels to *RP49* mRNA levels, average of the  $2^{\Delta\Delta Ct}$  for three biological replicates was calculated. Error bars were plotted using Standard deviation of the ratios. P-value was determined by one-tailed equal variance t-test by comparing ratios of mutants vs. wild-type strains. To calculate relative protein levels to mRNA levels, western blot analysis was carried out, and the fold protein change was divided by fold RNA change from qRT-PCR experiment.

### **Poly(A) tail length (PAT) Assay**

500ng of DNase treated RNA was reverse transcribed using Super Script III (Life Technologies, Cat.# 1808051) but instead of using oligo (dT), 5  $\mu$ l of anchored Oligo (dT) primer was used for each sample (Rangan et al. 2009a). 2  $\mu$ l of cDNA was then amplified using 0.5 $\mu$ l of gene specific forward primer, 0.5  $\mu$ l of anchored Oligo(d)T, 0.5  $\mu$ l of 10 $\mu$ M dNTP and 0.125  $\mu$ l Taq Polymerase and 2.5  $\mu$ l 10XTaq Polymerase Buffer. The thermal cycling conditions for PCR was 95°C for 30 seconds, 30 cycles of 95°C for 30 seconds, 2° below  $T_m$  of primer for 30 seconds, 65°C for 1.5 minutes, and 1 cycle of 65°C for 4 minutes. After PCR, 2.8  $\mu$ l of Orange-G dye was added to each sample and 10  $\mu$ l of PCR product was run on a 2.5% agarose gel. The gel was post-stained with ethidium bromide for 20 minutes, and then washed three times with H<sub>2</sub>O prior to imaging.

### **RNA sequencing and sample library preparation**

Total RNA was extracted with Trizol, treated with Turbo DNase and poly(A)+ RNA was isolated by double selection with poly-dT beads, using ~6 $\mu$ g total RNA, which is then followed by first- and second-strand synthesis. Sequencing libraries were prepared using NEXTflex Rapid Illumina DNA-Seq Library Prep Kit (Bio Scientific). Samples were single-

end sequenced on an NextSeq 500. RNA-seq reads were aligned via HISAT2 (Kim et al. 2015a) set to be splice aware to UCSC dm6 release 6.01. Count tables were generated using featureCounts (Liao et al. 2014).

### **Polysome profiling, Polysome-seq and Translation Efficiency (TE) Analysis**

~80 ovaries were dissected in PBS supplemented with cycloheximide and frozen immediately with liquid nitrogen. Tissue was homogenized in 200  $\mu$ l of cold lysis buffer consisting of 1x Polysome buffer supplemented with 1% Triton-X and 1 protease inhibitor pill per 10 ml of buffer. The lysate was centrifuged at 15,000 x g at 4°C for 10 minutes. 20% of lysate was kept aside for “Input RNA” libraries. 750 $\mu$ l of cleared lysate was loaded onto 10-50% sucrose gradients (500 mM KCl; 15 mM Tris-HCl, pH 7.5; 15 mM MgCl<sub>2</sub>; and 100  $\mu$ g/ml cycloheximide) in Beckman Coulter 9/16x3.5 PA tubes (Cat. #331372). Gradients were centrifuged at 35,000xg using a SW41 rotor for 3 hours at 4°C. Gradients were fractionated on a Brandel flow cell (Model #621140007) at 0.75 mls/min and 750 $\mu$ l was collected for each fraction with the sensitivity settings at 0.5 Abs. RNA was extracted from the fractions using standard acid phenol: chloroform extraction. The RNA pellet was washed with 80% ethanol and then air-dried. After air-drying the pellet was dissolved in 10  $\mu$ l of nuclease-free water. Turbo DNase treatment and library preparation was carried out as described above.

To determine translation efficiencies (TE), CPMs (counts per million) values were calculated for all polysome-seq libraries. Any transcript having zero reads in any library was discarded from analysis. The log<sub>2</sub> ratio between the polysome fraction and total mRNA was calculated and averaged between replicates. This ratio represents translation efficiency. Targets were defined as transcripts falling greater or less than one standard deviation from the median of translation efficiency in both RNAi lines compared to control (Kronja et al. 2014). To discover sequences similar to the pgc BRE in the 3’UTR of targets, all annotated 3’UTRs were downloaded from Flybase for all analyzed targets. A list of BREs and PREs that contain the core sequence UGUA were compiled manually through a literature search. Using the R package Biostrings this list was used to generate and apply a position weight matrix (pwm). This pwm was used to score all 10-mers in all of

the previously mentioned 3'UTRs. A minimum score of 90% was chosen as a cutoff by manually ensuring that the core sequence UGUA was present in all targets above the cutoff. Targets identified from polysome-seq were subsetted from the list of RNAs containing a pgc-like BRE in their 3'UTR using a custom R script.

### Oligonucleotides used for EMSA

*pgc* 3'UTR PRE sequence: UUUGUAAAUU

*pgc* 3'UTR ΔPRE sequence: UUAUUGUGAUUUUAUAGUUU

*CycB* 3'UTR NRE sequence: UAGACUAUUUGUAAUUUAUAUC

Scramble sequence: UAAUCAAGAUACAUAUAUGC

*osk* 3'UTR BRE sequence: CUUGAAUGUAUGUUAAUUGUAUGUAUUGAU<sub>p890</sub>

### Primers

*pgc* CDS\_F: 5'-ATGTGCGACTACCAGATGGAG-3'

*pgc* CDS\_R: 5'-TCAGAATCTCCATCTATCCGCGAT-3'

*pgc* 5'UTR\_F: 5'-CAAGAGAACAAGTTGAGCGTGG-3'

*vasa*\_F: 5'-CGCATTGGACGTACAGGTCG-3'

*vasa*\_R: 5'-TCTTCCTCGACATTGGTGGC-3'

*actin* CDS\_F: 5'-GTGTGACGAAGAAGTTGCTGC-3'

*actin* CDS\_R: 5'-TCAAAGTCGAGGGCAACATAG-3'

promoter *pgc*\_F: 5'-GCGGCCGCATAAAAGACTCAAGTTGACCGACATCCCCTTCC-3'

promoter *pgc*\_R: 5'-GCGCCACCGGTACGGATCTTCGTTTAAGATCTGACC-3'

5'UTR *α-tub*\_F: 5'-GCGCCACCGGTTTCATATTCGTTTTACGTTTGTCAAGCC-3'

5'UTR *α-tub*\_R: 5'-GCGCGACTAGTATTGAGTTTTTATTGGAAGTGTTCACACGCG-3'

5'UTR *nos*\_F: 5'-GGCCGACCGGTTTTAGTTGGCGCGTAGCTT-3'

5'UTR *nos*\_R: 5'-GGCGCACTAGTGGCGAAAATCCGGGTCTGA-3'

5'UTR *pgc*\_F: 5'-

ACCGGTTAGTTTAACATTTTTTTTTCTTCAAGAGAACAAGTTGAGCG-3'

5'UTR *pgc*\_R: 5-GAGCCAACTAGTTGACTCGAGCTGGACCTCCCA-3

**3'UTR *α-tub*\_F:** 5'-CCGCGCTCGAGTGAGCGTCACGCCACTTC-3'

**3'UTR *α-tub*\_R:** 5'-CCGCGGGTACCCTTATTTCTGACAACACTGAATCTGGCCG-3'

**3'UTR *K10*\_F:** 5'-GCGCCCTCGAGTGAGCAGCCAATGCAACCGAATCCG-3'

**3'UTR *K10*\_R:** 5'-GACGGGGTACCGTTGCAAATCTCTCTTTATTCTGCGG-3'

**3'UTR *pgc*\_F:** 5'-GCGTCCTCGAGTGACTGGACCTCCC-3'

**3'UTR *pgc*\_R:** 5'-

GGCCGCCGGTACCCACGATTGCGAATCGAAAATATATTTCTATCTATTTTTTTGGG-3'

***pgc* PAT primer 1:** 5'-ACCAGCCTTCAGAGGCGATCGTA-3'

***pgc* PAT primer 2:** 5'-ACCAGCCTTCAGAGGCGATCGTA-3'

**Anchored Oligo(d)T:** 5'-GCGAGCTCGGCGCCCGCGTTTTTTTTTTTT-3'

***pgc* qPCR\_F:** 5'-CCTCGATGGCATCCTACGAC-3'

***pgc* qPCR\_R:** 5'-ATCTCCATCTATCCGCGATGAC-3'

***GFP* qPCR\_F:** 5'-GCGACACCCTGGTGAACC-3'

***GFP* qPCR\_R:** 5'-GATGTGGCGGATCTTGAAG-3'

***osk* qPCR\_F:** 5'-CAACGAAAGGGGCGTGGTGCG-3'

***osk* qPCR\_R:** 5'-CGCTGCCGACCGATTTTGTTCAG-3'

***pgc* 3'UTR ΔPRE mutagenesis:**

5'GACCTCCCAAAGCCAACCTTATTGTGATATATAGTTTTAGCAGTTTTAGCAGTTCCG  
TTTGCCAC-3'

***pgc* 3'UTR UUUUAAUU:**

5'- GGA CCT CCC AAA AGC CAA CTT ATT GTG ATA TTT TTT AAT TAT AGT TTT  
AGC AGT TCG TTT GCC ACA TG -3'

***pgc* 3'UTR UCUCAAUU:**

5'- GGA CCT CCC AAA AGC CAA CTT ATT GTG ATA TTT CTC AAT TAT AGT TTT  
AGC AGT TCG TTT GCC ACA TG – 3'

***pgc* 3'UTR ΔUGUA:**

5'- GGA CCT CCC AAA AGC CAA CTT ATT GTG ATA TTA ATT ATA GTT TTA GCA  
GTT CGT TTG CCA CAT G -3'

## **Acknowledgements**

We would like to thank the following people for gifting us with re-agents: Dr. Buszczak (UT Southwestern), Dr. Lilly (NIH) and Dr. Lehmann (NYUMC) for providing us with Nanos, Bruno (IP experiment) and Bruno (IF experiment) antibodies respectively. Dr. Salz (Case Western) and Dr. Nakamura (RIKEN) for providing us with *pumGFP* and *me31BGFP*-Trap reporter transgenes respectively. Dr. Goldstrohm (University of Minnesota) for gifting us the Pumilio protein expression vector. Dr. Lehmann (NYUMC) for giving us the *pum*<sup>680</sup> mutant fly. Dr. Trcek (NYUMC) and Dr. Lehmann for providing us with the GFP *in situ* probes. This work was initiated when P.R. was in Ruth Lehmann's lab at NYUMC.

## **Competing interests**

No competing interests declared.

## **Author Contributions**

P.F., S.W.D., E.T.M., R.J.P. and P.R. designed experiments, analyzed and interpreted data. P.F., S.W.D., R.J.P., M.N., A.O., P.B., D.P. performed experiments. P.F. and P.R. wrote the manuscript, which all authors edited and approved.

## **Funding**

P.R is funded by NIH/NIGMS RO1 1119484-1-68857 and Pew Biomedical Scholars Program.

## References:

- Anderson RA, Fulton N, Cowan G, Coutts S, Saunders PT. 2007. Conserved and divergent patterns of expression of DAZL, VASA and OCT4 in the germ cells of the human fetal ovary and testis. *BMC Developmental Biology* **7**: 136.
- Arrizabalaga G, Lehmann R. 1999. A selective screen reveals discrete functional domains in *Drosophila* Nanos. *Genetics* **153**: 1825–1838.
- Asaoka-Taguchi M, Yamada M, Nakamura A, Hanyu K, Kobayashi S. 1999. Maternal Pumilio acts together with Nanos in germline development in *Drosophila* embryos. *Nature Cell Biology* **1**: 431–437.
- Astigarraga S, Hofmeyer K, Farajian R, Treisman JE. 2010. Three *Drosophila* liprins interact to control synapse formation. *J Neurosci* **30**: 15358–15368.
- Bailey TL, Boden M, Buske FA, Frith M, Grant CE, Clementi L, Ren J, Li WW, Noble WS. 2009. MEME SUITE: tools for motif discovery and searching. *Nucleic Acids Research* **37**: W202–8.
- Barreau C, Paillard L, Méreau A, Osborne HB. 2006. Mammalian CELF/Bruno-like RNA-binding proteins: molecular characteristics and biological functions. *Biochimie* **88**: 515–525.
- Becalska AN, Gavis ER. 2009. Lighting up mRNA localization in *Drosophila* oogenesis. *Development* **136**: 2493–2503.
- Behm-Ansmant I, Rehwinkel J, Doerks T, Stark A, Bork P, Izaurralde E. 2006. mRNA degradation by miRNAs and GW182 requires both CCR4:NOT deadenylase and DCP1:DCP2 decapping complexes. *Genes & Development* **20**: 1885–1898.
- Carreira-Rosario A, Bhargava V, Hillebrand J, Kollipara RK, Ramaswami M, Buszczak M. 2016. Repression of Pumilio Protein Expression by Rbfox1 Promotes Germ Cell Differentiation. *Developmental Cell* **36**: 562–571.
- Castagnetti S, Hentze MW, Ephrussi A, Gebauer F. 2000. Control of oskar mRNA translation by Bruno in a novel cell-free system from *Drosophila* ovaries. *Development* **127**: 1063–1068.
- Chekulaeva M, Hentze MW, Ephrussi A. 2006. Bruno Acts as a Dual Repressor of oskar Translation, Promoting mRNA Oligomerization and Formation of Silencing Particles. *Cell* **124**: 521–533.
- Chen D, McKearin DM. 2003. A discrete transcriptional silencer in the bam gene determines asymmetric division of the *Drosophila* germline stem cell. *Development* **130**: 1159–1170.

- Chicoine J, Benoit P, Gamberi C, Paliouras M, Simonelig M, Lasko P. 2007. Bicaudal-C recruits CCR4-NOT deadenylase to target mRNAs and regulates oogenesis, cytoskeletal organization, and its own expression. *Developmental Cell* **13**: 691–704.
- Cho PF, Gamberi C, Cho-Park YA, Cho-Park IB, Lasko P, Sonenberg N. 2006. Cap-Dependent Translational Inhibition Establishes Two Opposing Morphogen Gradients in *Drosophila* Embryos. *Current Biology* **16**: 2035–2041.
- Cho PF, Poulin F, Cho-Park YA, Cho-Park IB, Chicoine JD, Lasko P, Sonenberg N. 2005. A new paradigm for translational control: inhibition via 5′-3′ mRNA tethering by Bicoid and the eIF4E cognate 4EHP. *Cell* **121**: 411–423.
- Cinalli RM, Rangan P, Lehmann R. 2008. Germ cells are forever. *Cell* **132**: 559–562.
- Ciosk R. 2006. Translational Regulators Maintain Totipotency in the *Caenorhabditis elegans* Germline. *Science* **311**: 851–853.
- Draper BW, Mello CC, Bowerman B, Hardin J, Priess JR. 1996. MEX-3 Is a KH Domain Protein That Regulates Blastomere Identity in Early *C. elegans* Embryos. *Cell* **87**: 205–216.
- Eichhorn SW, Subtelny AO, Kronja I, Kwasnieski JC, Orr-Weaver TL, Bartel DP. 2016. mRNA poly(A)-tail changes specified by deadenylation broadly reshape translation in *Drosophila* oocytes and early embryos. *eLife* **5**: 714.
- Eulalio A, Rehwinkel J, Stricker M, Huntzinger E, Yang S-F, Doerks T, Dorner S, Bork P, Boutros M, Izaurralde E. 2007. Target-specific requirements for enhancers of decapping in miRNA-mediated gene silencing. *Genes & Development* **21**: 2558–2570.
- Evans T. 2005. Translational control of maternal RNAs. *WormBook*.
- Fan S-J, Marchand V, Ephrussi A. 2011. *Drosophila* Ge-1 Promotes P Body Formation and oskar mRNA Localization ed. J.E. Treisman. *PLoS ONE* **6**: e20612.
- Fenger-Grøn M, Fillman C, Norrild B, Lykke-Andersen J. 2005. Multiple Processing Body Factors and the ARE Binding Protein TTP Activate mRNA Decapping. *Molecular Cell* **20**: 905–915.
- Filardo P, Ephrussi A. 2003. Bruno regulates gurken during *Drosophila* oogenesis. *Mechanisms of Development* **120**: 289–297.
- Flora P, Schowalter S, Wong-Deyrup S, DeGennaro M, Nasrallah MA, Rangan P. 2018. Transient transcriptional silencing alters the cell cycle to promote germline stem cell differentiation in *Drosophila*. *Dev Biol* **434**: 84–95.
- Forbes A, Lehmann R. 1998. Nanos and Pumilio have critical roles in the development and function of *Drosophila* germline stem cells. *Development* **125**: 679–690.



- Fu Z, Geng C, Wang H, Yang Z, Weng C, Li H, Deng L, Liu L, Liu N, Ni J, et al. 2015. Twin Promotes the Maintenance and Differentiation of Germline Stem Cell Lineage through Modulation of Multiple Pathways. *Cell Reports* **13**: 1366–1379.
- Garneau NL, Wilusz J, Wilusz CJ. 2007. The highways and byways of mRNA decay. *Nature Reviews Molecular Cell Biology* **8**: 113–126.
- Gavis ER, Lehmann R. 1992. Localization of nanos RNA controls embryonic polarity. *Cell* **71**: 301–313.
- Gavis ER, Lehmann R. 1994. Translational regulation of nanos by RNA localization. *Nature* **369**: 315–318.
- Gilboa L, Lehmann R. 2004a. How different is Venus from Mars? The genetics of germline stem cells in *Drosophila* females and males. *Development* **131**: 4895–4905.
- Gilboa L, Lehmann R. 2004b. Repression of Primordial Germ Cell Differentiation Parallels Germ Line Stem Cell Maintenance. *Current Biology* **14**: 981–986.
- Good PJ, Chen Q, Warner SJ, Herring DC. 2000. A family of human RNA-binding proteins related to the *Drosophila* Bruno translational regulator. *J Biol Chem* **275**: 28583–28592.
- Hanyu-Nakamura K, Sonobe-Nojima H, Tanigawa A, Lasko P, Nakamura A. 2008. *Drosophila* Pgc protein inhibits P-TEFb recruitment to chromatin in primordial germ cells. *Nature* **451**: 730–733.
- Harris RE, Pargett M, Sutcliffe C, Umulis D, Ashe HL. 2011. Brat Promotes Stem Cell Differentiation via Control of a Bistable Switch that Restricts BMP Signaling. *Developmental Cell* **20**: 72–83.
- Harrison MM, Li X-Y, Kaplan T, Botchan MR, Eisen MB. 2011. Zelda Binding in the Early *Drosophila melanogaster* Embryo Marks Regions Subsequently Activated at the Maternal-to-Zygotic Transition ed. G.P. Copenhaver. *PLoS Genet* **7**: e1002266.
- He J, Stewart K, Kinnell HL, Anderson RA, Childs AJ. 2013. A Developmental Stage-Specific Switch from DAZL to BOLL Occurs during Fetal Oogenesis in Humans, but Not Mice ed. S. Schlatt. *PLoS ONE* **8**: e73996.
- Jenkins HT, Baker-Wilding R, Edwards TA. 2009. Structure and RNA binding of the mouse Pumilio-2 Puf domain. *Journal of Structural Biology* **167**: 271–276.
- Johnstone O, Lasko P. 2001. Translational Regulation and RNA Localization in *Drosophila* Oocytes and Embryos. *Annual Review of Genetics* **35**: 365–406.
- Joly W, Chartier A, Rojas-Rios P, Busseau I, Simonelig M. 2013. The CCR4 Deadenyase Acts with Nanos and Pumilio in the Fine-Tuning of Mei-P26

- Expression to Promote Germline Stem Cell Self-Renewal. *Stem Cell Reports* **1**: 411–424.
- Jones AR, Francis R, Schedl T. 1996. GLD-1, a Cytoplasmic Protein Essential for Oocyte Differentiation, Shows Stage- and Sex-Specific Expression during *Caenorhabditis elegans* Germline Development. *Dev Biol* **180**: 165–183.
- Kadyrova LY, Habara Y, Lee TH, Wharton RP. 2007. Translational control of maternal Cyclin B mRNA by Nanos in the *Drosophila* germline. *Development* **134**: 1519–1527.
- Kim D, Langmead B, Salzberg SL. 2015a. HISAT: a fast spliced aligner with low memory requirements. *Nat Methods* **12**: 357–360.
- Kim G, Pai C-I, Sato K, Person MD, Nakamura A, Macdonald PM. 2015b. Region-Specific Activation of oskar mRNA Translation by Inhibition of Bruno-Mediated Repression ed. N. Perrimon. *PLoS Genet* **11**: e1004992.
- Kim-Ha J, Kerr K, Macdonald PM. 1995. Translational regulation of oskar mRNA by Bruno, an ovarian RNA-binding protein, is essential. *Cell* **81**: 403–412.
- Koch EA, Smith PA, King RC. 1967. The division and differentiation of *Drosophila* cystocytes. *Journal of Morphology* **121**: 55–70.
- Kress C, Gautier-Courteille C, Osborne HB, Babinet C, Paillard L. 2007. Inactivation of CUG-BP1/CELF1 Causes Growth, Viability, and Spermatogenesis Defects in Mice. *Molecular and Cellular Biology* **27**: 1146–1157.
- Kronja I, Yuan B, Eichhorn SW, Dzek K, Krijgsveld J, Bartel DP, Orr-Weaver TL. 2014. Widespread changes in the posttranscriptional landscape at the *Drosophila* oocyte-to-embryo transition. *Cell Reports* **7**: 1495–1508.
- Kuersten S, Goodwin EB. 2003. The power of the 3' UTR: translational control and development. *Nature Reviews Genetics* **4**: 626–637.
- Lasko P. 2012. mRNA Localization and Translational Control in *Drosophila* Oogenesis. *Cold Spring Harbor Perspectives in Biology* **4**: a012294–a012294.
- Laver JD, Marsolais AJ, Smibert CA, Lipshitz HD. 2015. Regulation and Function of Maternal Gene Products During the Maternal-to-Zygotic Transition in *Drosophila*. *Curr Top Dev Biol* **113**: 43–84.
- Lee MT, Bonneau AR, Giraldez AJ. 2014. Zygotic Genome Activation During the Maternal-to-Zygotic Transition. *Annual Review of Cell and Developmental Biology* **30**: 581–613.

- Li Y, Minor NT, Park JK, McKearin DM, Maines JZ. 2009. Bam and Bgcn antagonize Nanos-dependent germ-line stem cell maintenance. *Proc Natl Acad Sci USA* **106**: 9304–9309.
- Liang H-L, Nien C-Y, Liu H-Y, Metzstein MM, Kirov N, Rushlow C. 2008. The zinc-finger protein Zelda is a key activator of the early zygotic genome in *Drosophila*. *Nature* **456**: 400–403.
- Liao Y, Smyth GK, Shi W. 2014. featureCounts: an efficient general purpose program for assigning sequence reads to genomic features. *Bioinformatics* **30**: 923–930.
- Lin H, Spradling AC. 1997. A novel group of pumilio mutations affects the asymmetric division of germline stem cells in the *Drosophila* ovary. *Development* **124**: 2463–2476.
- Mak W, Chen D, Uyhazi K, Lin H. 2013. The role of Pumilio 1, a translational regulator, in the mammalian female germline. *Fertility and Sterility* **100**: S54.
- Mak W, Fang C, Holden T, Dratver MB, Lin H. 2016. An Important Role of Pumilio 1 in Regulating the Development of the Mammalian Female Germline. *Biol Reprod* **94**: 134.
- Margolis J, Spradling A. 1995. Identification and behavior of epithelial stem cells in the *Drosophila* ovary. *Development* **121**: 3797–3807.
- Martinho RG, Kunwar PS, Casanova J, Lehmann R. 2004. A noncoding RNA is required for the repression of RNAPolIII-dependent transcription in primordial germ cells. *Curr Biol* **14**: 159–165.
- McKearin D, Ohlstein B. 1995. A role for the *Drosophila* bag-of-marbles protein in the differentiation of cystoblasts from germline stem cells. *Development* **121**: 2937–2947.
- McKearin DM, Spradling AC. 1990. bag-of-marbles: a *Drosophila* gene required to initiate both male and female gametogenesis. *Genes & Development* **4**: 2242–2251.
- Meins M, Schlickum S, Wilhelm C, Mißbach J, Yadav S, Gläser B, Grzmil M, Burfeind P, Laccone F. 2002. Identification and characterization of murine *Brunol4*, a new member of the elav/bruno family. *Cytogenetic and Genome Research* **97**: 254–260.
- Merritt C, Rasoloson D, Ko D, Seydoux G. 2008. 3' UTRs Are the Primary Regulators of Gene Expression in the *C. elegans* Germline. *Current Biology* **18**: 1476–1482.
- Meyer S, Temme C, Wahle E. 2010. Messenger RNA Turnover in Eukaryotes: Pathways and Enzymes. *Critical Reviews in Biochemistry and Molecular Biology* **39**: 197–216.

- Moor CH de, Meijer H, Lissenden S. 2005. Mechanisms of translational control by the 3' UTR in development and differentiation. *Seminars in Cell & Developmental Biology* **16**: 49–58.
- Moore FL, Jaruzelska J, Fox MS, Urano J, Firpo MT, Turek PJ, Dorfman DM, Pera RAR. 2003. Human Pumilio-2 is expressed in embryonic stem cells and germ cells and interacts with DAZ (Deleted in AZoospermia) and DAZ-Like proteins. *Proceedings of the National Academy of Sciences* **100**: 538–543.
- Moore J, Han H, Lasko P. 2009. Bruno negatively regulates germ cell-less expression in a BRE-independent manner. *Mechanisms of Development* **126**: 503–516.
- Mootz D, Ho DM, Hunter CP. 2004. The STAR/Maxi-KH domain protein GLD-1 mediates a developmental switch in the translational control of *C. elegans* PAL-1. *Development* **131**: 3263–3272.
- Moraes KCM, Wilusz CJ, Wilusz J. 2006. CUG-BP binds to RNA substrates and recruits PARN deadenylase. *RNA* **12**: 1084–1091.
- Morris JZ. 2005. twin, a CCR4 homolog, regulates cyclin poly(A) tail length to permit *Drosophila* oogenesis. *Development* **132**: 1165–1174.
- Muraro NI, Weston AJ, Gerber AP, Luschnig S, Moffat KG, Baines RA. 2008. Pumilio binds para mRNA and requires Nanos and Brat to regulate sodium current in *Drosophila* motoneurons. *J Neurosci* **28**: 2099–2109.
- Murata Y, Wharton RP. 1995. Binding of pumilio to maternal hunchback mRNA is required for posterior patterning in *drosophila* embryos. *Cell* **80**: 747–756.
- Nakamura A, Amikura R, Hanyu K, Kobayashi S. 2001. Me31B silences translation of oocyte-localizing RNAs through the formation of cytoplasmic RNP complex during *Drosophila* oogenesis. *Development* **128**: 3233–3242.
- Nakamura A, Amikura R, Mukai M, Kobayashi S, Lasko PF. 1996. Requirement for a Noncoding RNA in *Drosophila* Polar Granules for Germ Cell Establishment. *Science* **274**: 2075–2079.
- Nakamura A, Sato K, Hanyu-Nakamura K. 2004. *Drosophila* cup is an eIF4E binding protein that associates with Bruno and regulates oskar mRNA translation in oogenesis. *Developmental Cell* **6**: 69–78.
- Nien C-Y, Liang H-L, Butcher S, Sun Y, Fu S, Gocha T, Kirov N, Manak JR, Rushlow C. 2011. Temporal Coordination of Gene Networks by Zelda in the Early *Drosophila* Embryo ed. G.S. Barsh. *PLoS Genet* **7**: e1002339.
- Olesnicky EC, Bhogal B, Gavis ER. 2012. Combinatorial use of translational co-factors for cell type-specific regulation during neuronal morphogenesis in *Drosophila*. *Dev Biol* **365**: 208–218.

- Ozgur S, Basquin J, Kamenska A, Filipowicz W, Standart N, Conti E. 2015. Structure of a Human 4E-T/DDX6/CNOT1 Complex Reveals the Different Interplay of DDX6-Binding Proteins with the CCR4-NOT Complex. *Cell Reports* **13**: 703–711.
- Rangan P, DeGennaro M, Jaime-Bustamante K, Coux R-X, Martinho RG, Lehmann R. 2009a. Temporal and spatial control of germ-plasm RNAs. *Curr Biol* **19**: 72–77.
- Rangan P, DeGennaro M, Lehmann R. 2009b. Regulating Gene Expression in the Drosophila Germ Line. *Cold Spring Harbor Symposia on Quantitative Biology* **73**: 1–8.
- Richter JD, Lasko P. 2011. Translational Control in Oocyte Development. *Cold Spring Harbor Perspectives in Biology* **3**: a002758–a002758.
- Rosario R, Childs AJ, Anderson RA. 2017. RNA-binding proteins in human oogenesis: Balancing differentiation and self-renewal in the female fetal germline. *Stem Cell Research* **21**: 193–201.
- Rouya C, Siddiqui N, Morita M, Duchaine TF, Fabian MR, Sonenberg N. 2014. Human DDX6 effects miRNA-mediated gene silencing via direct binding to CNOT1. *RNA* **20**: 1398–1409.
- Sachs A, Wahle E. 1993. Poly(A) tail metabolism and function in eucaryotes. *J Biol Chem* **268**: 22955–22958.
- Sallés FJ, Strickland S. 1999. Analysis of Poly(A) Tail Lengths by PCR: The PAT Assay. In *RNA-Protein Interaction Protocols*, Vol. 118 of, pp. 441–448, Humana Press, New Jersey.
- Schüpbach T, Wieschaus E. 1991. Female sterile mutations on the second chromosome of *Drosophila melanogaster*. II. Mutations blocking oogenesis or altering egg morphology. *Genetics* **129**: 1119–1136.
- Serano TL, Cheung H-K, Frank LH, Cohen RS. 1994. P element transformation vectors for studying *Drosophila melanogaster* oogenesis and early embryogenesis. *Gene* **138**: 181–186.
- Seydoux G, Braun RE. 2006. Pathway to Totipotency: Lessons from Germ Cells. *Cell* **127**: 891–904.
- Siemen H, Colas D, Heller HC, Brüstle O, Reijo Pera RA. 2011. Pumilio-2 Function in the Mouse Nervous System ed. X. Zhuang. *PLoS ONE* **6**: e25932.
- Siemen H, Xu E, Brüstle O, Reijo Pera RA. 2008. The function of the mammalian Pumilio gene, Pum1, in early embryonic development of mice. *Dev Biol* **319**: 583.
- Slaidina M, Lehmann R. 2014. Translational control in germline stem cell development. *The Journal of Cell Biology* **207**: 13–21.

- Snee M, Benz D, Jen J, Macdonald PM. 2014. Two distinct domains of Bruno bind specifically to the oskarnRNA. *RNA Biology* **5**: 49–57.
- Sonoda J, Wharton RP. 2001. Drosophila Brain Tumor is a translational repressor. *Genes & Development* **15**: 762–773.
- Sonoda J, Wharton RP. 1999. Recruitment of Nanos to hunchback mRNA by Pumilio. *Genes & Development* **13**: 2704–2712.
- Spasov DS, Jurecic R. 2003. Mouse Pum1 and Pum2 genes, members of the Pumilio family of RNA-binding proteins, show differential expression in fetal and adult hematopoietic stem cells and progenitors☆☆Sequence data from this article have been deposited with the EMBL/GenBank Data Libraries under Accession Nos. AF321909 and AF315590. *Blood Cells, Molecules, and Diseases* **30**: 55–69.
- Spradling AC, de Cuevas M, Drummond-Barbosa D, Keyes L, Lilly M, Pepling M, Xie T. 1997. The Drosophila gerarium: stem cells, germ line cysts, and oocytes. *Cold Spring Harbor Symposia on Quantitative Biology* **62**: 25–34.
- Sugimura I, Lilly MA. 2006. Bruno inhibits the expression of mitotic cyclins during the prophase I meiotic arrest of Drosophila oocytes. *Developmental Cell* **10**: 127–135.
- Tadros W, Lipshitz HD. 2009. The maternal-to-zygotic transition: a play in two acts. *Development* **136**: 3033–3042.
- Temme C, Simonelig M, Wahle E. 2014. Deadenylation of mRNA by the CCR4-NOT complex in Drosophila: molecular and developmental aspects. *Front Genet* **5**: 143.
- Temme C, Zaessinger S, Meyer S, Simonelig M, Wahle E. 2004. A complex containing the CCR4 and CAF1 proteins is involved in mRNA deadenylation in Drosophila. *The EMBO Journal* **23**: 2862–2871.
- Temme C, Zhang L, Kremmer E, Ihling C, Chartier A, Sinz A, Simonelig M, Wahle E. 2010. Subunits of the Drosophila CCR4-NOT complex and their roles in mRNA deadenylation. *RNA* **16**: 1356–1370.
- Timinszky G, Bortfeld M, Ladurner AG. 2008. Repression of RNA polymerase II transcription by a Drosophila oligopeptide. ed. H.A. El-Shemy. *PLoS ONE* **3**: e2506.
- Trcek T, Lionnet T, Shroff H, Lehmann R. 2017. mRNA quantification using single-molecule FISH in Drosophila embryos. *Nat Protoc* **12**: 1326–1348.
- Tsuda M. 2003. Conserved Role of nanos Proteins in Germ Cell Development. *Science* **301**: 1239–1241.
- Vlasova IA, Tahoe NM, Fan D, Larsson O, Rattenbacher B, Sternjohn JR, Vasdewani J, Karypis G, Reilly CS, Bitterman PB, et al. 2008. Conserved GU-rich elements



- mediate mRNA decay by binding to CUG-binding protein 1. *Molecular Cell* **29**: 263–270.
- Wagnon JL, Mahaffey CL, Sun W, Yang Y, Chao HT, Frankel WN. 2011. Etiology of a genetically complex seizure disorder in *Celf4* mutant mice. *Genes, Brain and Behavior* **10**: 765–777.
- Wang X, Zamore PD, Hall TM. 2001. Crystal structure of a Pumilio homology domain. *Molecular Cell* **7**: 855–865.
- Wang Z, Lin H. 2005. The division of *Drosophila* germline stem cells and their precursors requires a specific cyclin. *Curr Biol* **15**: 328–333.
- Webster PJ, Liang L, Berg CA, Lasko P, Macdonald PM. 1997. Translational repressor bruno plays multiple roles in development and is widely conserved. *Genes & Development* **11**: 2510–2521.
- Weidmann CA, Qiu C, Arvola RM, Lou T-F, Killingsworth J, Campbell ZT, Tanaka Hall TM, Goldstrohm AC. 2016. *Drosophila* Nanos acts as a molecular clamp that modulates the RNA-binding and repression activities of Pumilio. *eLife* **5**: 1948.
- Wharton RP, Sonoda J, Lee T, Patterson M, Murata Y. 1998. The Pumilio RNA-Binding Domain Is Also a Translational Regulator. *Molecular Cell* **1**: 863–872.
- Wharton RP, Struhl G. 1991. RNA regulatory elements mediate control of *Drosophila* body pattern by the posterior morphogen nanos. *Cell* **67**: 955–967.
- Wickens M, Bernstein DS, Kimble J, Parker R. 2002. A PUF family portrait: 3'UTR regulation as a way of life. *Trends in Genetics* **18**: 150–157.
- Wilkie GS, Dickson KS, Gray NK. 2003. Regulation of mRNA translation by 5'- and 3'-UTR-binding factors. *Trends Biochem Sci* **28**: 182–188.
- Xie T, Spradling AC. 1998. decapentaplegic is essential for the maintenance and division of germline stem cells in the *Drosophila* ovary. *Cell* **94**: 251–260.
- Xin T, Xuan T, Tan J, Li M, Zhao G, Li M. 2013. The *Drosophila* putative histone acetyltransferase Enok maintains female germline stem cells through regulating Bruno and the niche. *Dev Biol* **384**: 1–12.
- Zalokar M. 1960. Sites of ribonucleic acid and protein synthesis in *Drosophila*. *Experimental Cell Research* **19**: 184–186.
- Zhang B, Gallegos M, Puoti A, Durkin E, Fields S, Kimble J, Wickens MP. 1997. A conserved RNA-binding protein that regulates sexual fates in the *C. elegans* hermaphrodite germ line. *Nature* **390**: 477–484.



Zhang K, Smith GW. 2015. Maternal control of early embryogenesis in mammals.  
*Reproduction, Fertility and Development* **27**: 880–896.

Zhang M, Chen D, Xia J, Han W, Cui X, Neuenkirchen N, Hermes G, Sestan N, Lin H.  
2017. Post-transcriptional regulation of mouse neurogenesis by Pumilio proteins.  
*Genes & Development* **31**: 1354–1369.
